# Supplementary material for: Genome-wide association study of seed protein, oil and amino acid contents in soybean from maturity groups I to IV
Source: PubMed Central journal article supplement (PMC6531425; doi:10.1007/s00122-019-03304-5), 2019-02-26
Supplement: 122_2019_3304_MOESM2_ESM.pdf [file 122_2019_3304_MOESM2_ESM.pdf]

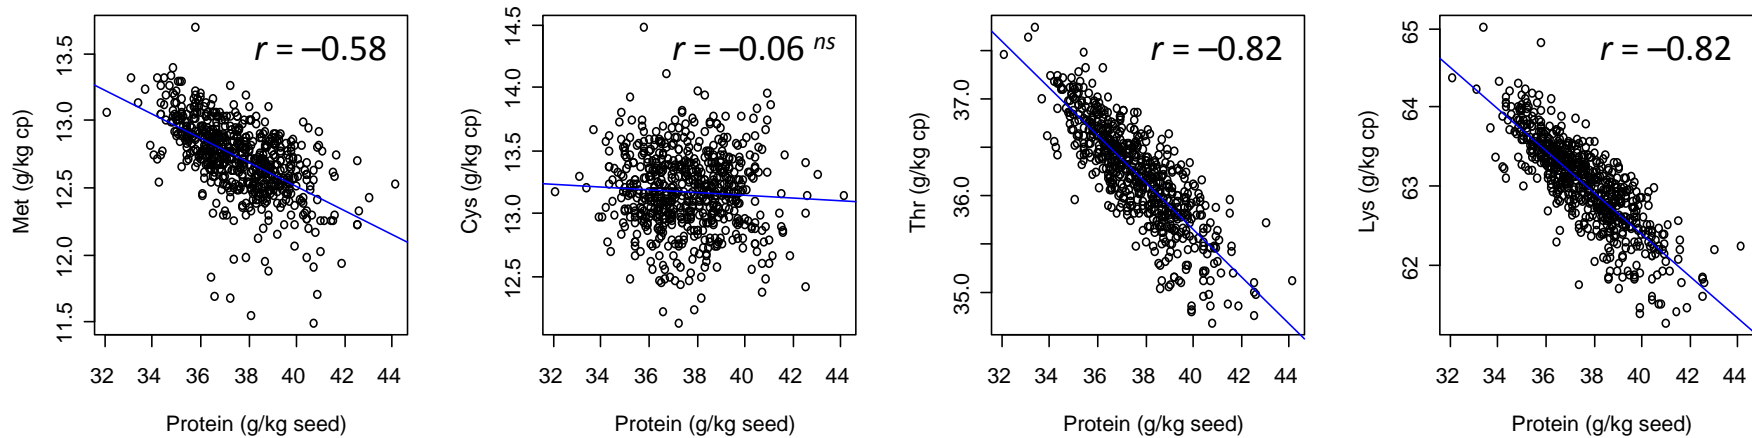

**Fig. S1** Correlations between protein and amino acids by scaled BLUP values across all environments among the 621 plant introductions ( $P < 0.0001$  for Met, Thr and Lys).

**(a)**

$$\text{DeltaK} = \text{mean}(|L''(K)|) / \text{sd}(L(K))$$

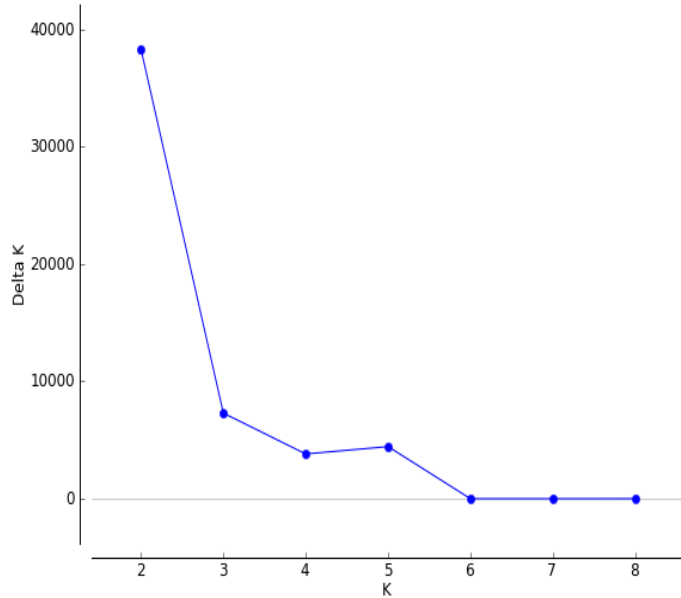**(b)**

| K | Reps | Mean LnP(K)  | Stdev LnP(K) | Ln'(K)      | Ln''(K)     | Delta K     |
|---|------|--------------|--------------|-------------|-------------|-------------|
| 1 | 10   | -2300952.59  | 1.4185       | NA          | NA          | NA          |
| 2 | 10   | -2118115.47  | 1.9477       | 182837.12   | 74600.19    | 38302.14266 |
| 3 | 10   | -2009878.54  | 3.8661       | 108236.93   | 28196.35    | 7293.135146 |
| 4 | 10   | -1929837.96  | 5.243        | 80040.58    | 19981.64    | 3811.088434 |
| 5 | 10   | -1869779.02  | 5.5108       | 60058.94    | 24459.23111 | 4438.451997 |
| 6 | 10   | -1834179.311 | 5593.685     | 35599.70889 | 88.057778   | 0.015742    |
| 7 | 10   | -1798667.66  | 7191.4043    | 35511.65111 | 9544.48     | 1.327207    |
| 8 | 10   | -1772700.489 | 1628.0735    | 25967.17111 | 6275.772222 | 3.854723    |
| 9 | 10   | -1753009.09  | 3724.2806    | 19691.39889 | NA          | NA          |

**Fig. S2** Results of *Delta K* analysis that determined the most like number of sub-populations from the STRUCTURE output

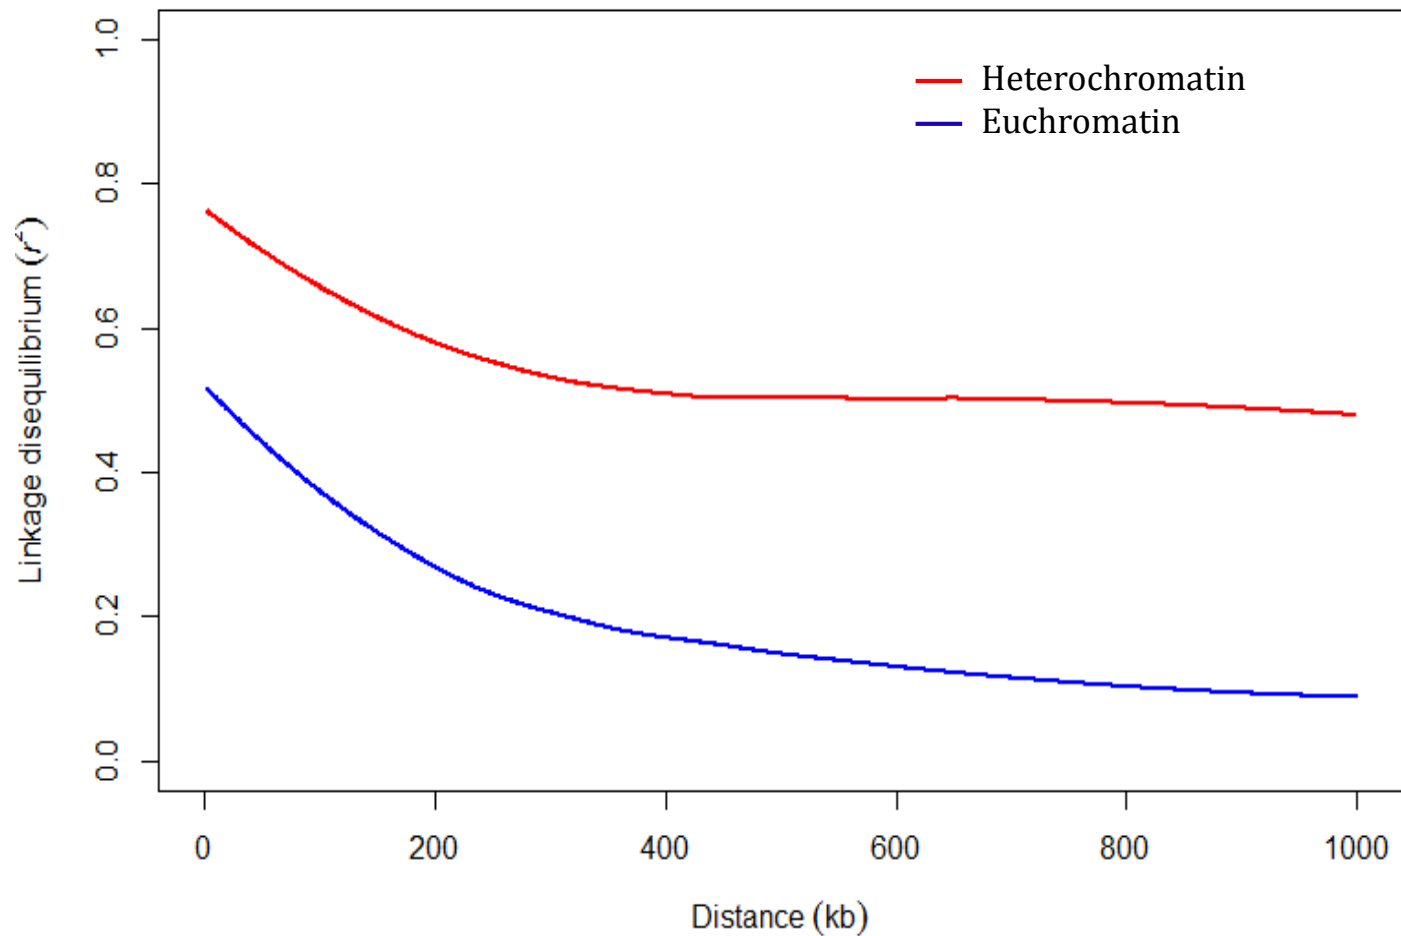

**Fig. S3** Linkage disequilibrium ( $r^2$ ) as a function of physical distance (kb) between marker pairs in heterochromatic and euchromatic chromosome regions.

Protein\_OHW14

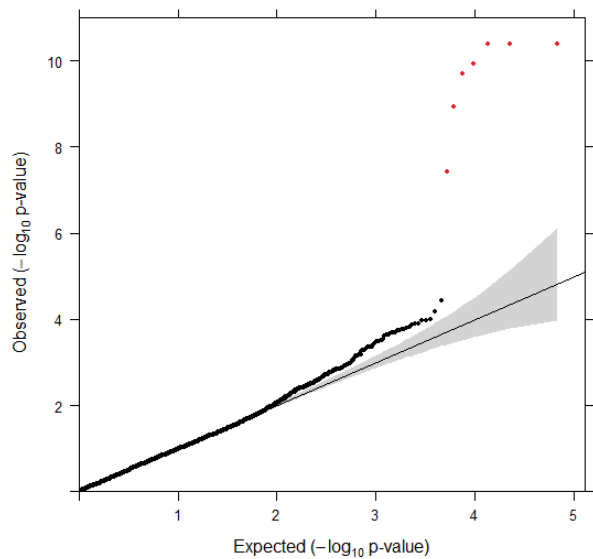

Protein\_OHW15

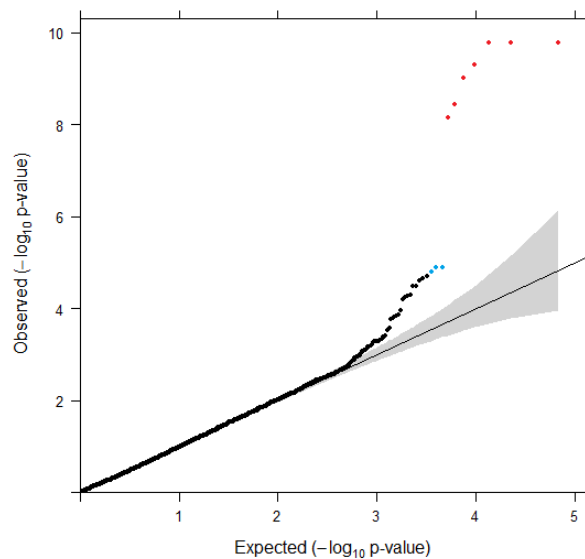

Protein\_OHC15

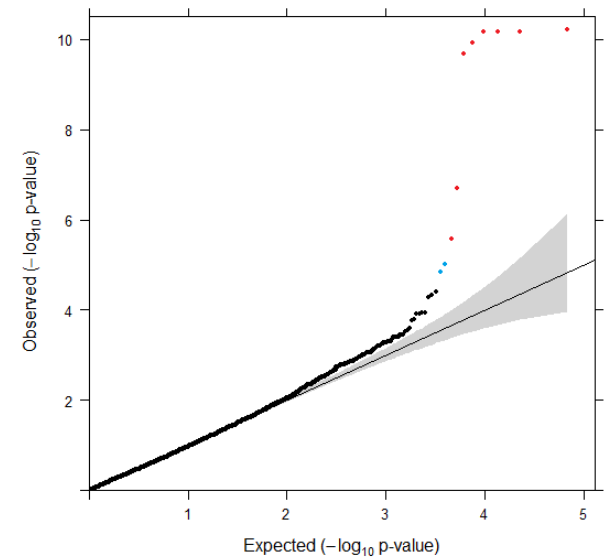

Protein\_IL15

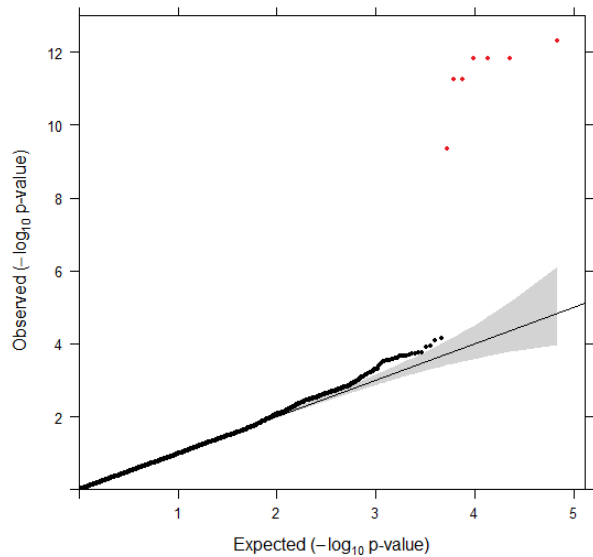

Protein\_NC15

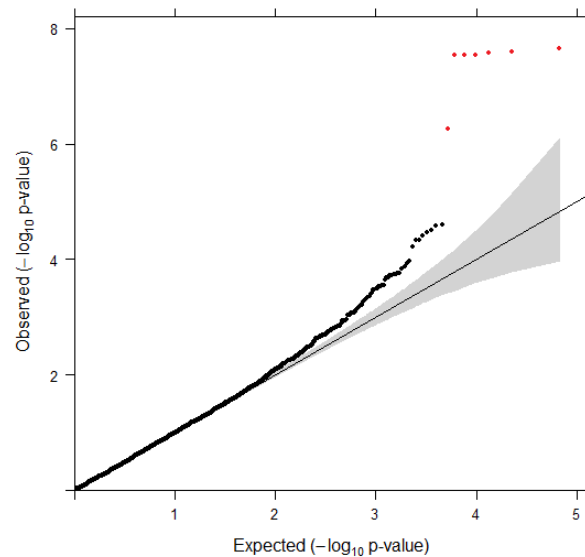

Protein\_ALL

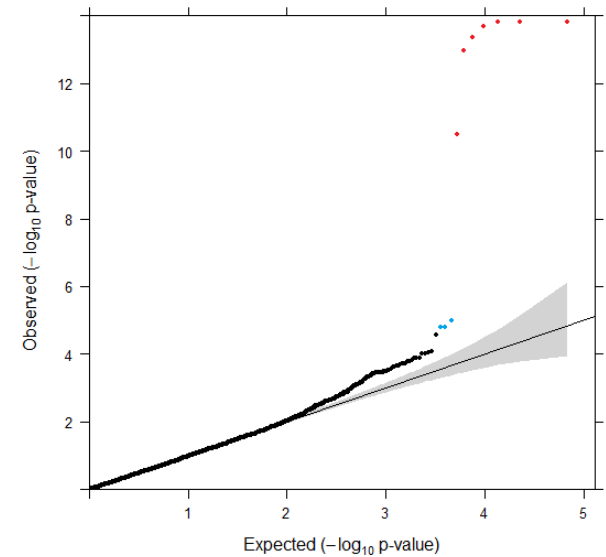

**Fig. S4** QQ-plots for GWAS of 621 soybean accessions for seed protein content using CMLM. 34,014 SNPs were plotted for each environment and all environments combined. Red and blue dots represent the SNPs significantly associated at genome-wide significant threshold (5%) and suggestive significance thresholds (25%), respectively. Shaded region of the QQ-plots represent a 95% confidence interval.

Oil\_OHW14

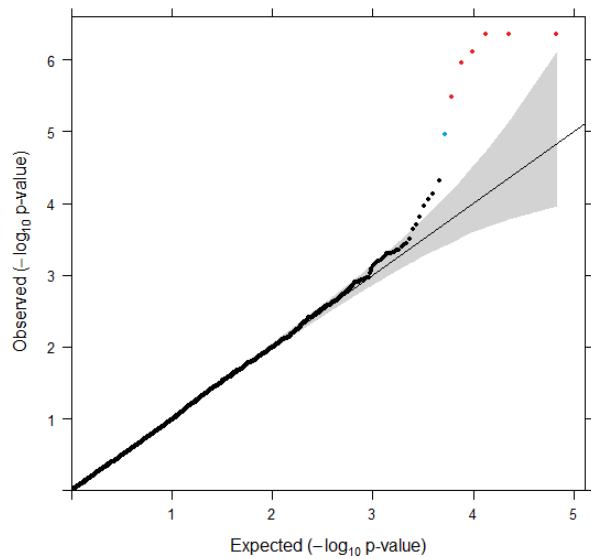

Oil\_OHW15

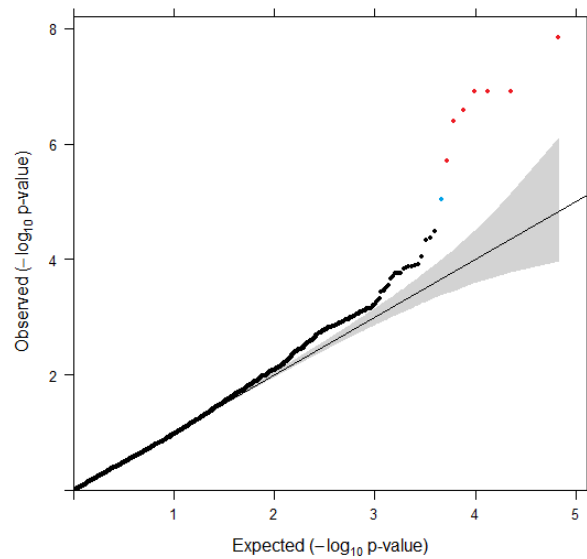

Oil\_OHC15

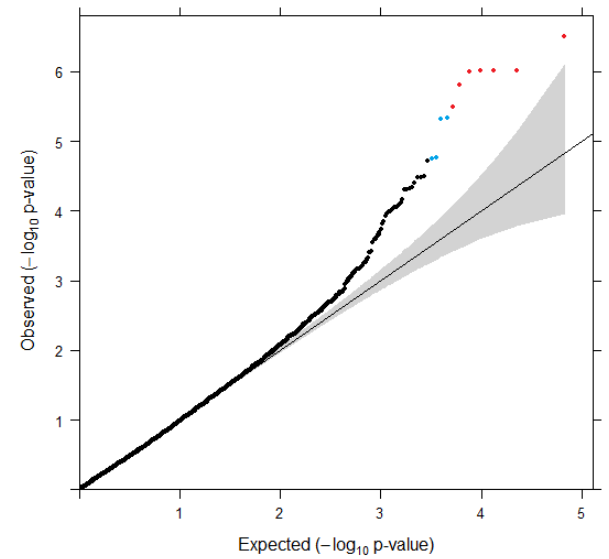

Oil\_IL15

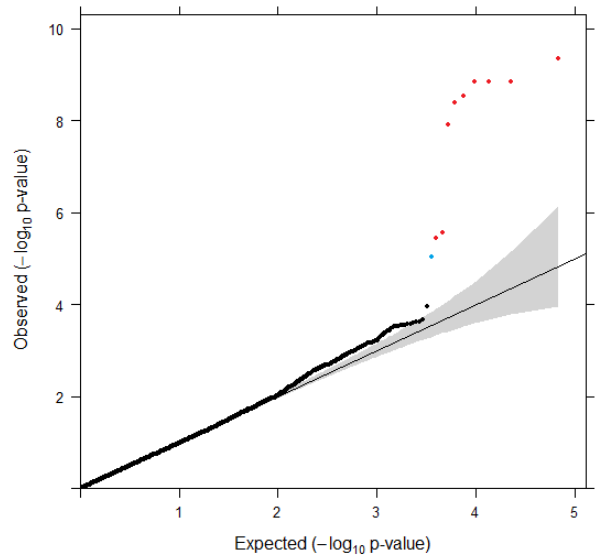

Oil\_NC15

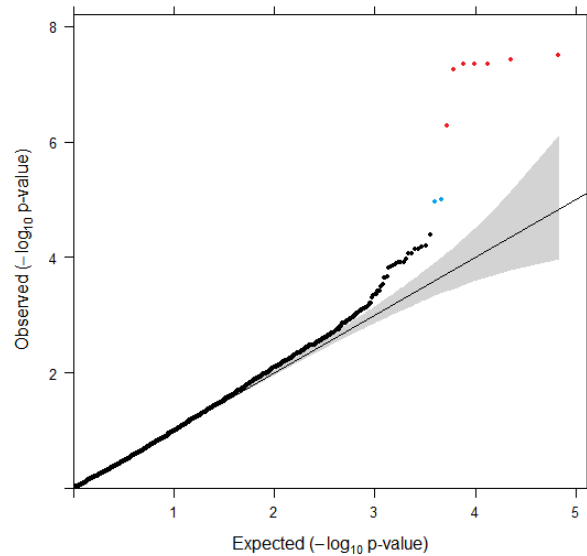

Oil\_ALL

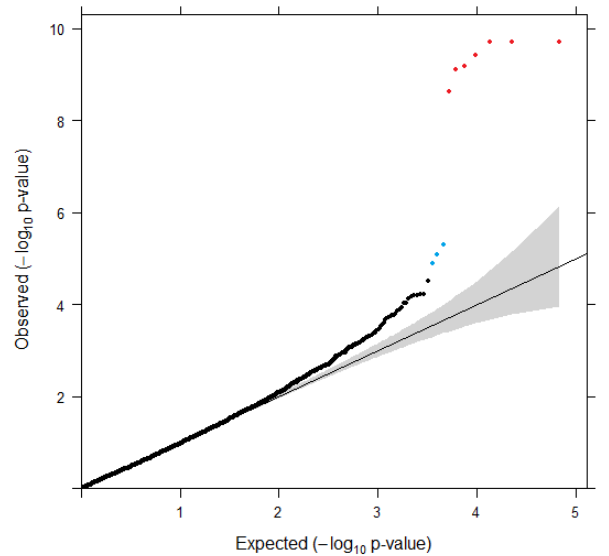

**Fig. S5** QQ-plots for GWAS of 621 soybean accessions for seed oil content using CMLM. 34,014 SNPs were plotted for each environment and all environments combined. Red and blue dots represent the SNPs significantly associated at genome-wide significant threshold (5%) and suggestive significance thresholds (25%), respectively. Shaded region of the QQ-plots represent a 95% confidence interval.

Protein\_OHW14

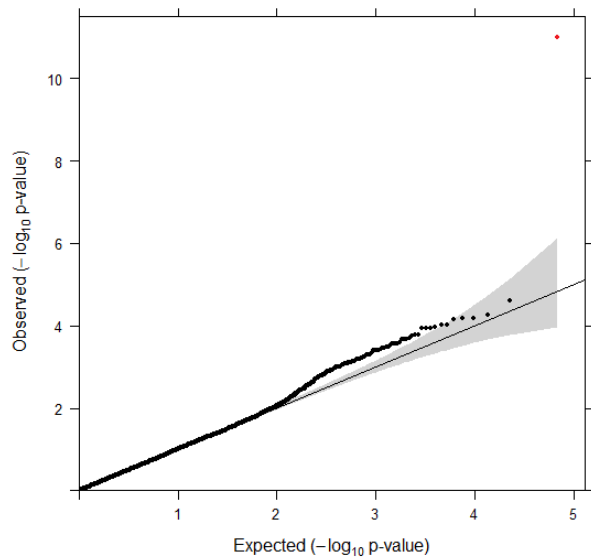

Protein\_OHW15

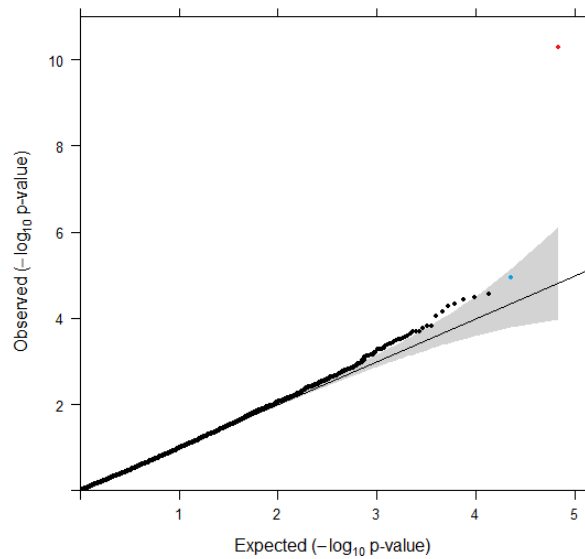

Protein\_OHC15

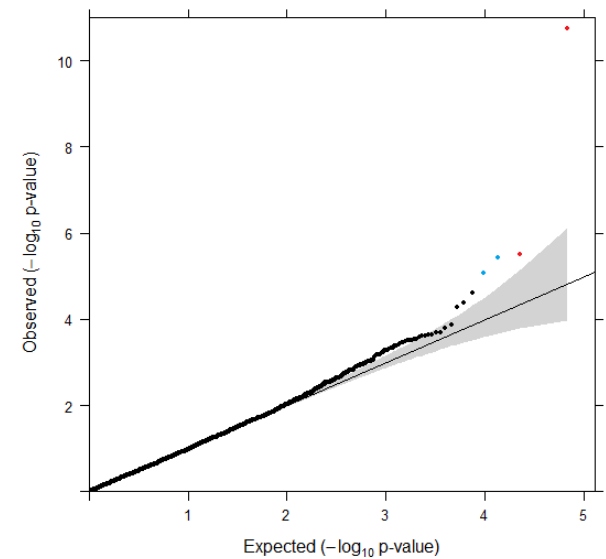

Protein\_IL15

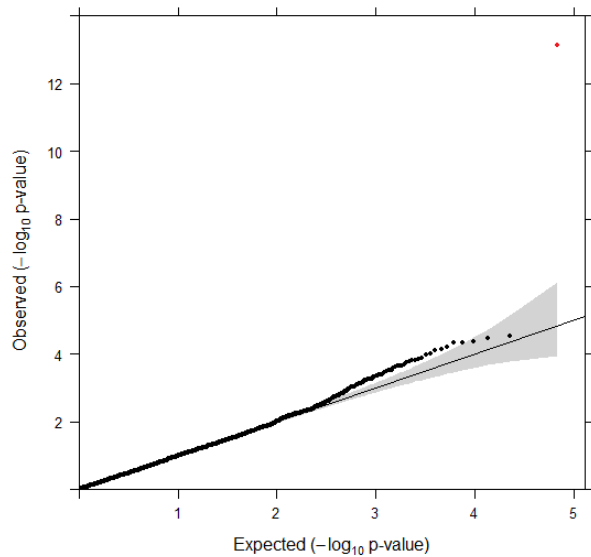

Protein\_NC15

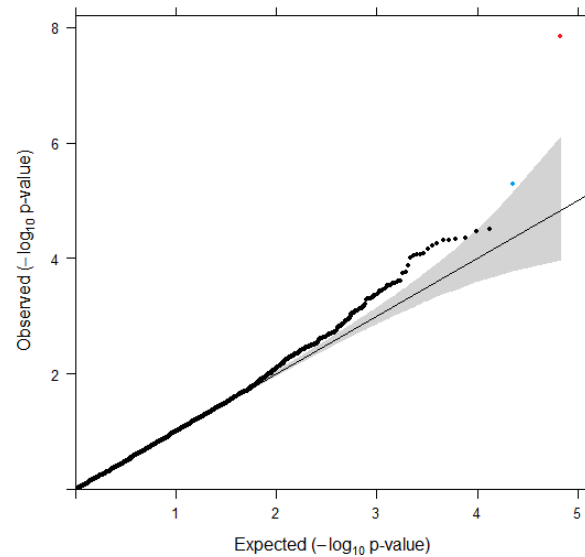

Protein\_ALL

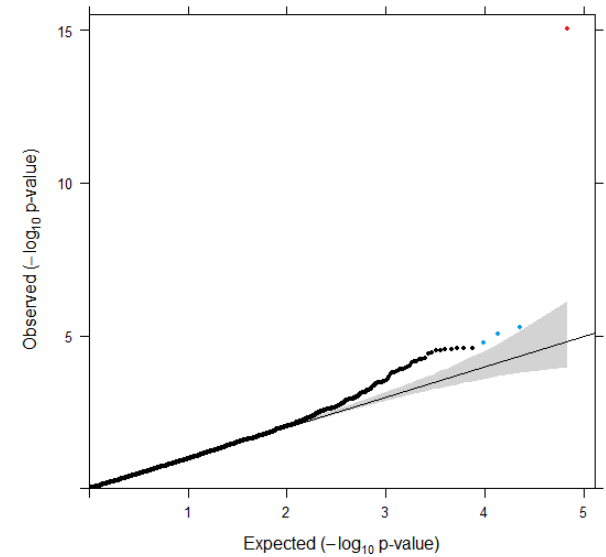

**Fig. S6** QQ-plots for GWAS of 621 soybean accessions for seed protein content using MLM. 34,014 SNPs were plotted for each environment and all environments combined. Red and blue dots represent the SNPs significantly associated at genome-wide significant threshold (5%) and suggestive significance thresholds (25%), respectively. Shaded region of the QQ-plots represent a 95% confidence interval.

Oil\_OHW14

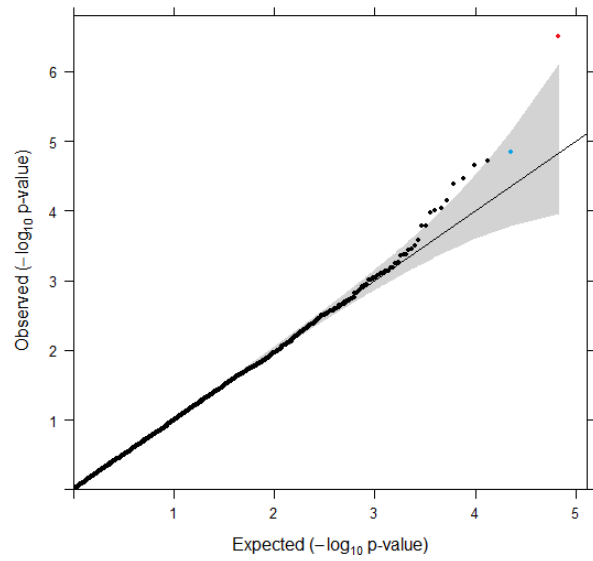

Oil\_OHW15

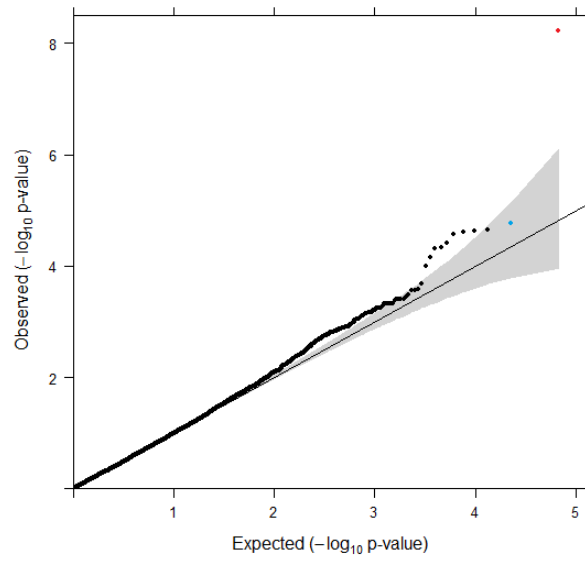

Oil\_OHC15

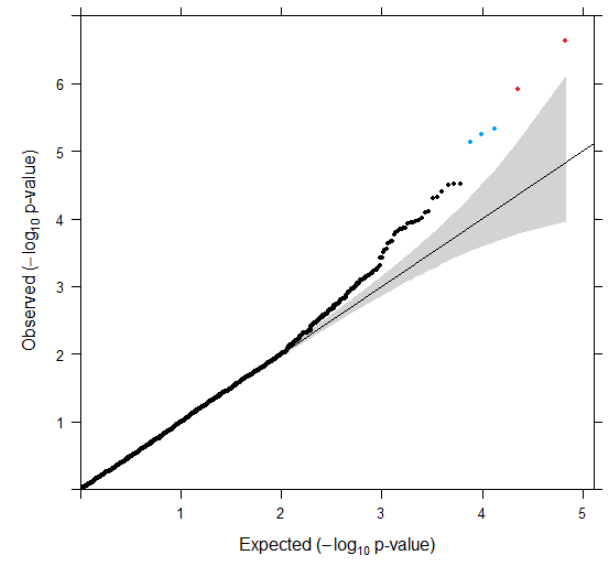

Oil\_IL15

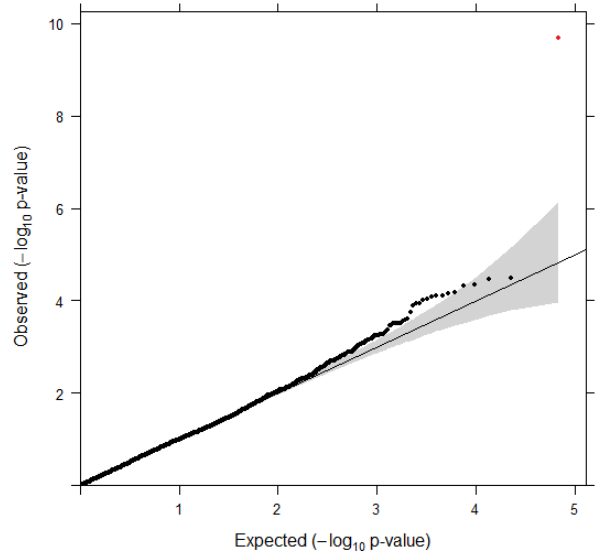

Oil\_NC15

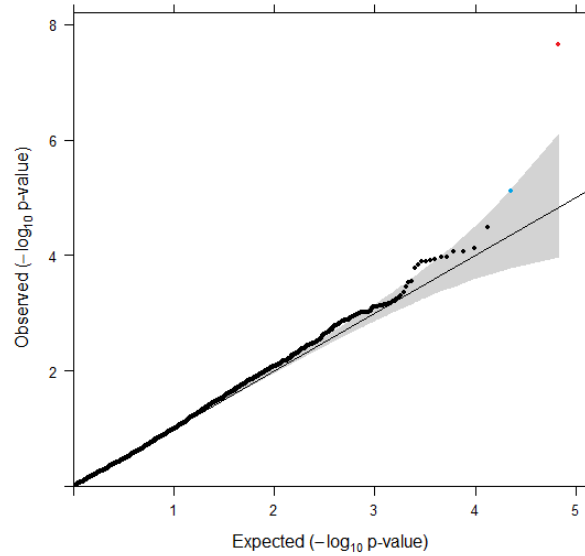

Oil\_ALL

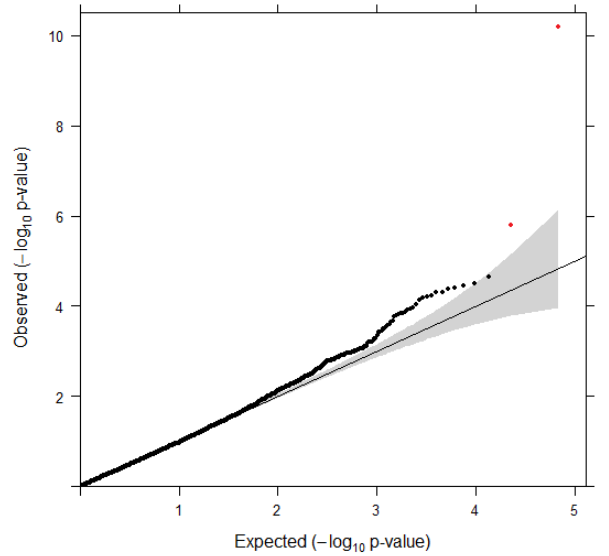

**Fig. S7** QQ-plots (right) for GWAS of 621 soybean accessions for seed oil content using MLM. 34,014 SNPs were plotted by each environment and all environments combined. Red and blue dots represent the SNPs significantly associated at genome-wide significant threshold (5%) and suggestive significance thresholds (25%), respectively. Shaded region of the QQ-plots represent a 95% confidence interval.

**Opposite\_OHW14**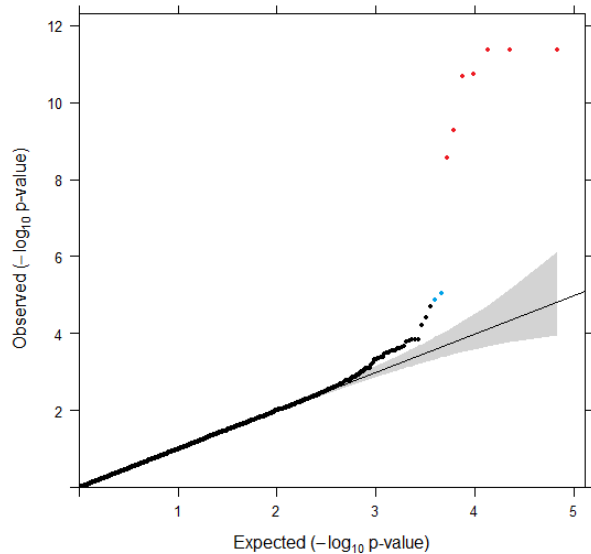**Opposite\_OHW15**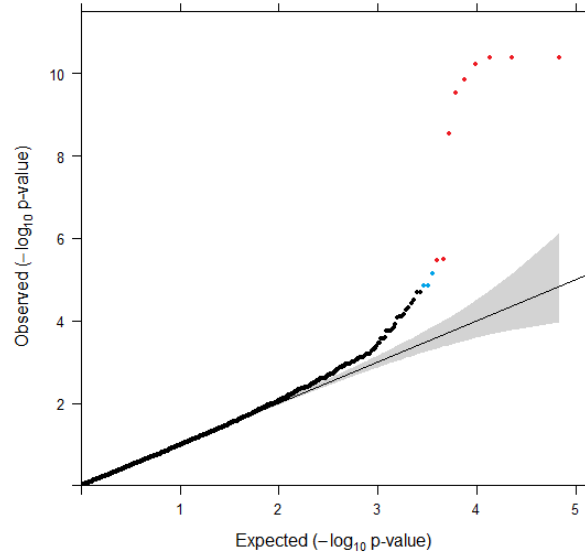**Opposite\_OHC15**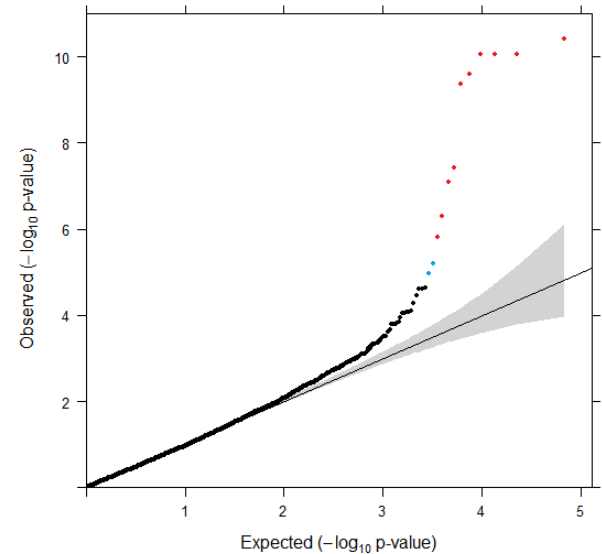**Opposite\_IL15**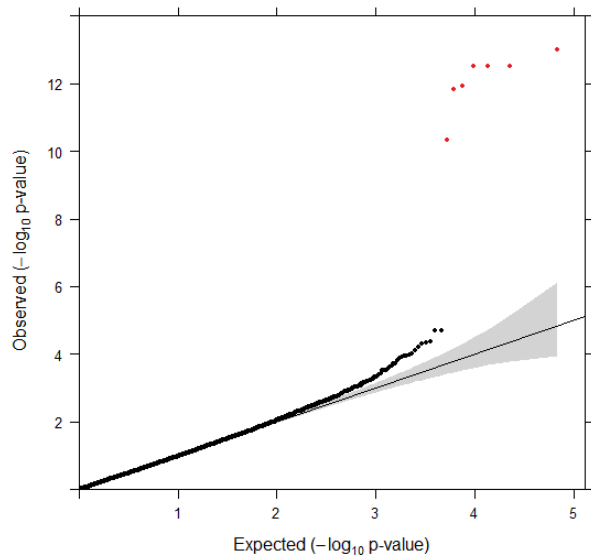**Opposite\_NC15**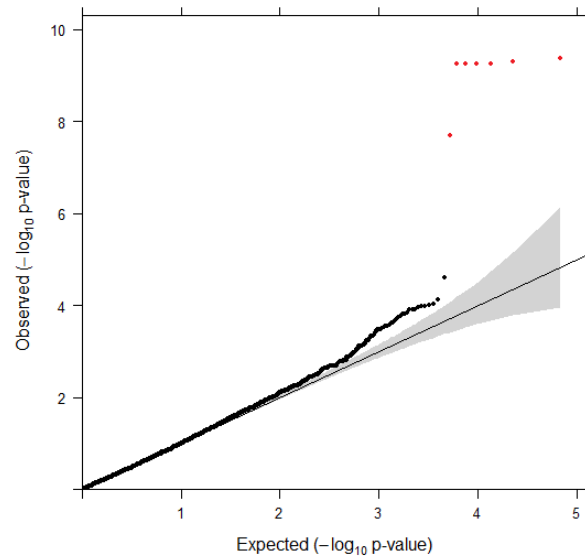**Opposite\_ALL**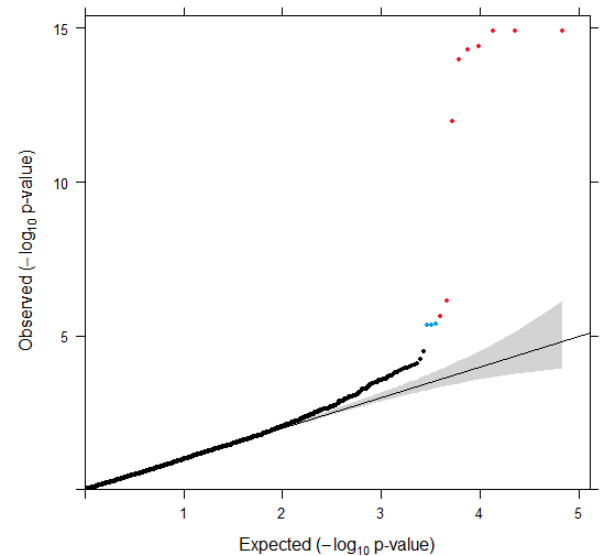

**Fig. S8** QQ-plots for GWAS of 621 soybean accessions for seed protein and oil content using MTMM-opposite. 34,014 SNPs were plotted for each environment and all environments combined. Red and blue dots represent the SNPs significantly associated at genome-wide significant threshold (5%) and suggestive significance thresholds (25%), respectively. Shaded region of the QQ-plots represent a 95% confidence interval.



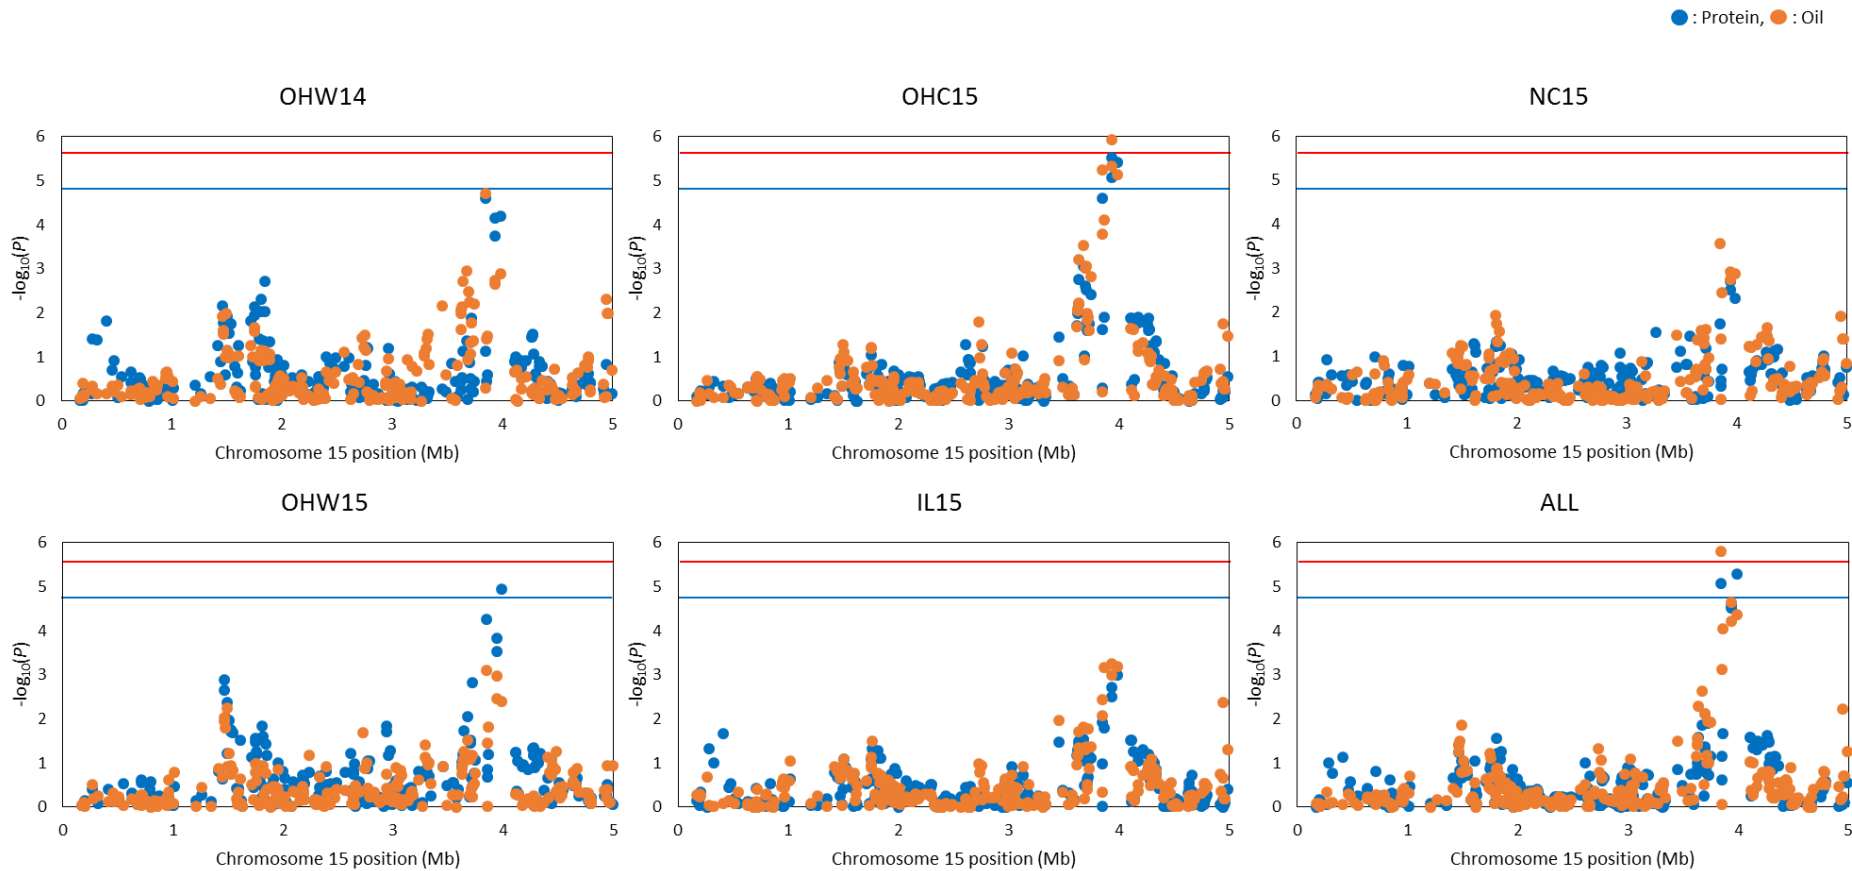

**Fig. S9** Manhattan plots for protein and oil content by each environment for a 5-Mb region surrounding significantly associated SNPs on chromosome 15. Negative  $\log_{10}$   $P$ -values of MLM are plotted against physical position (Glyma.W82.a2.v1). Red and blue horizontal lines represent genome-wide significant threshold (5%) and suggestive thresholds (25%), respectively.

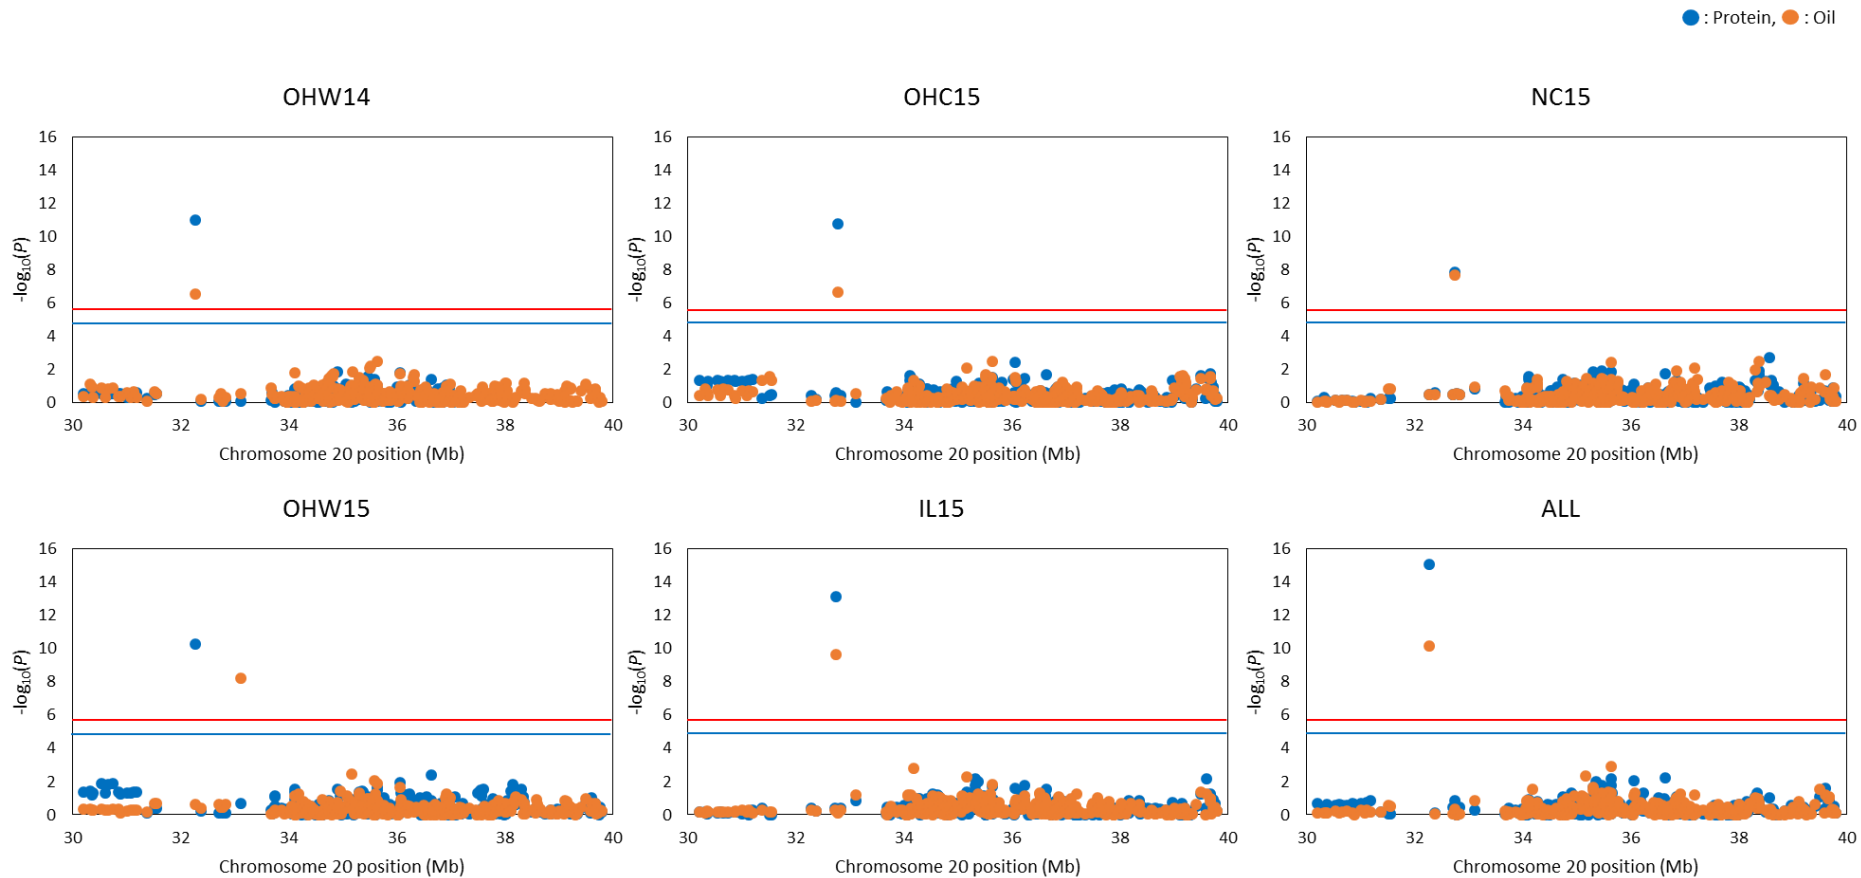

**Fig. S10** Manhattan plots for protein and oil content by each environment for a 10-Mb region surrounding significantly associated markers on chromosome 20. Negative log<sub>10</sub> P-values of MLMM are plotted against physical position (Glyma.W82.a2.v1). Red and blue horizontal lines represent genome-wide significant threshold (5%) and suggestive thresholds (25%), respectively.

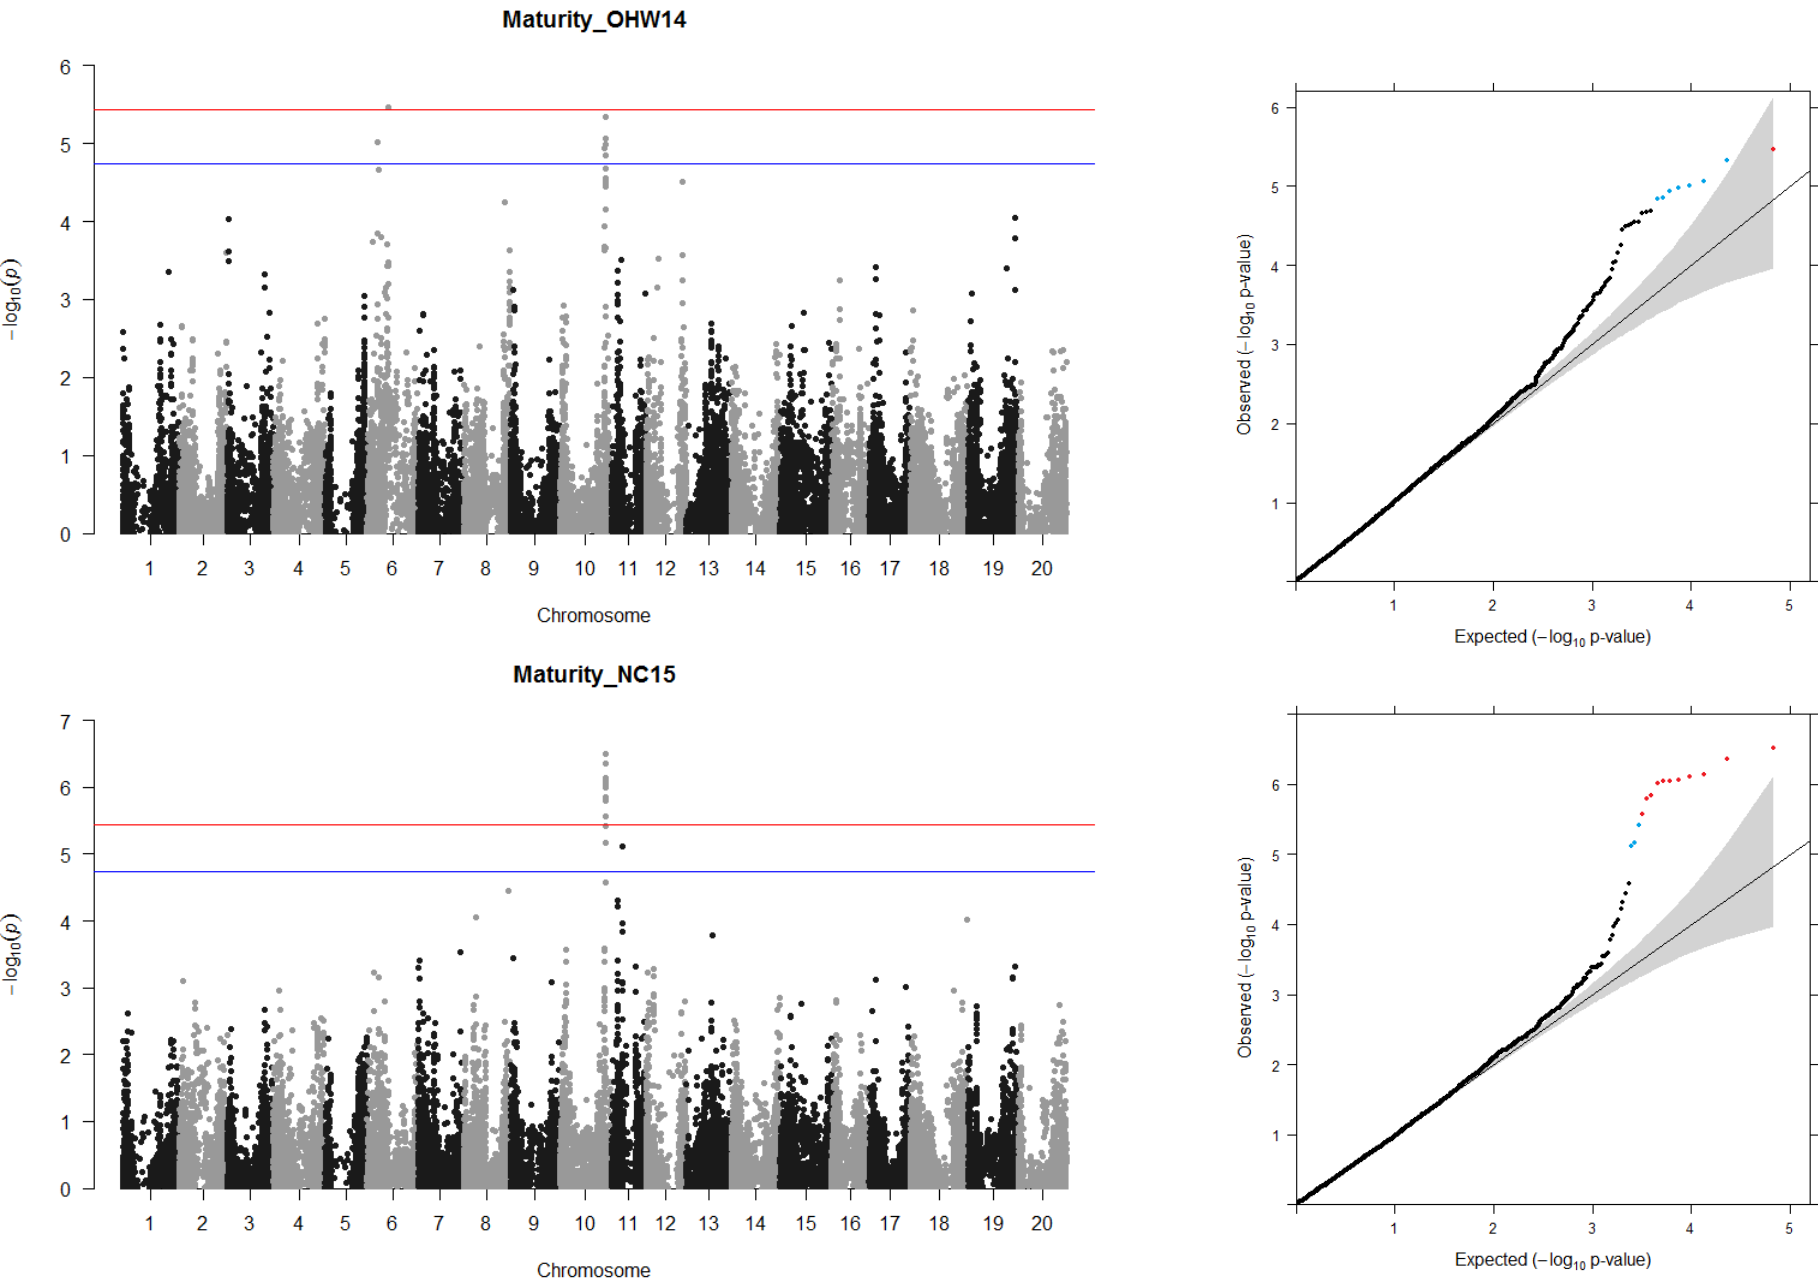

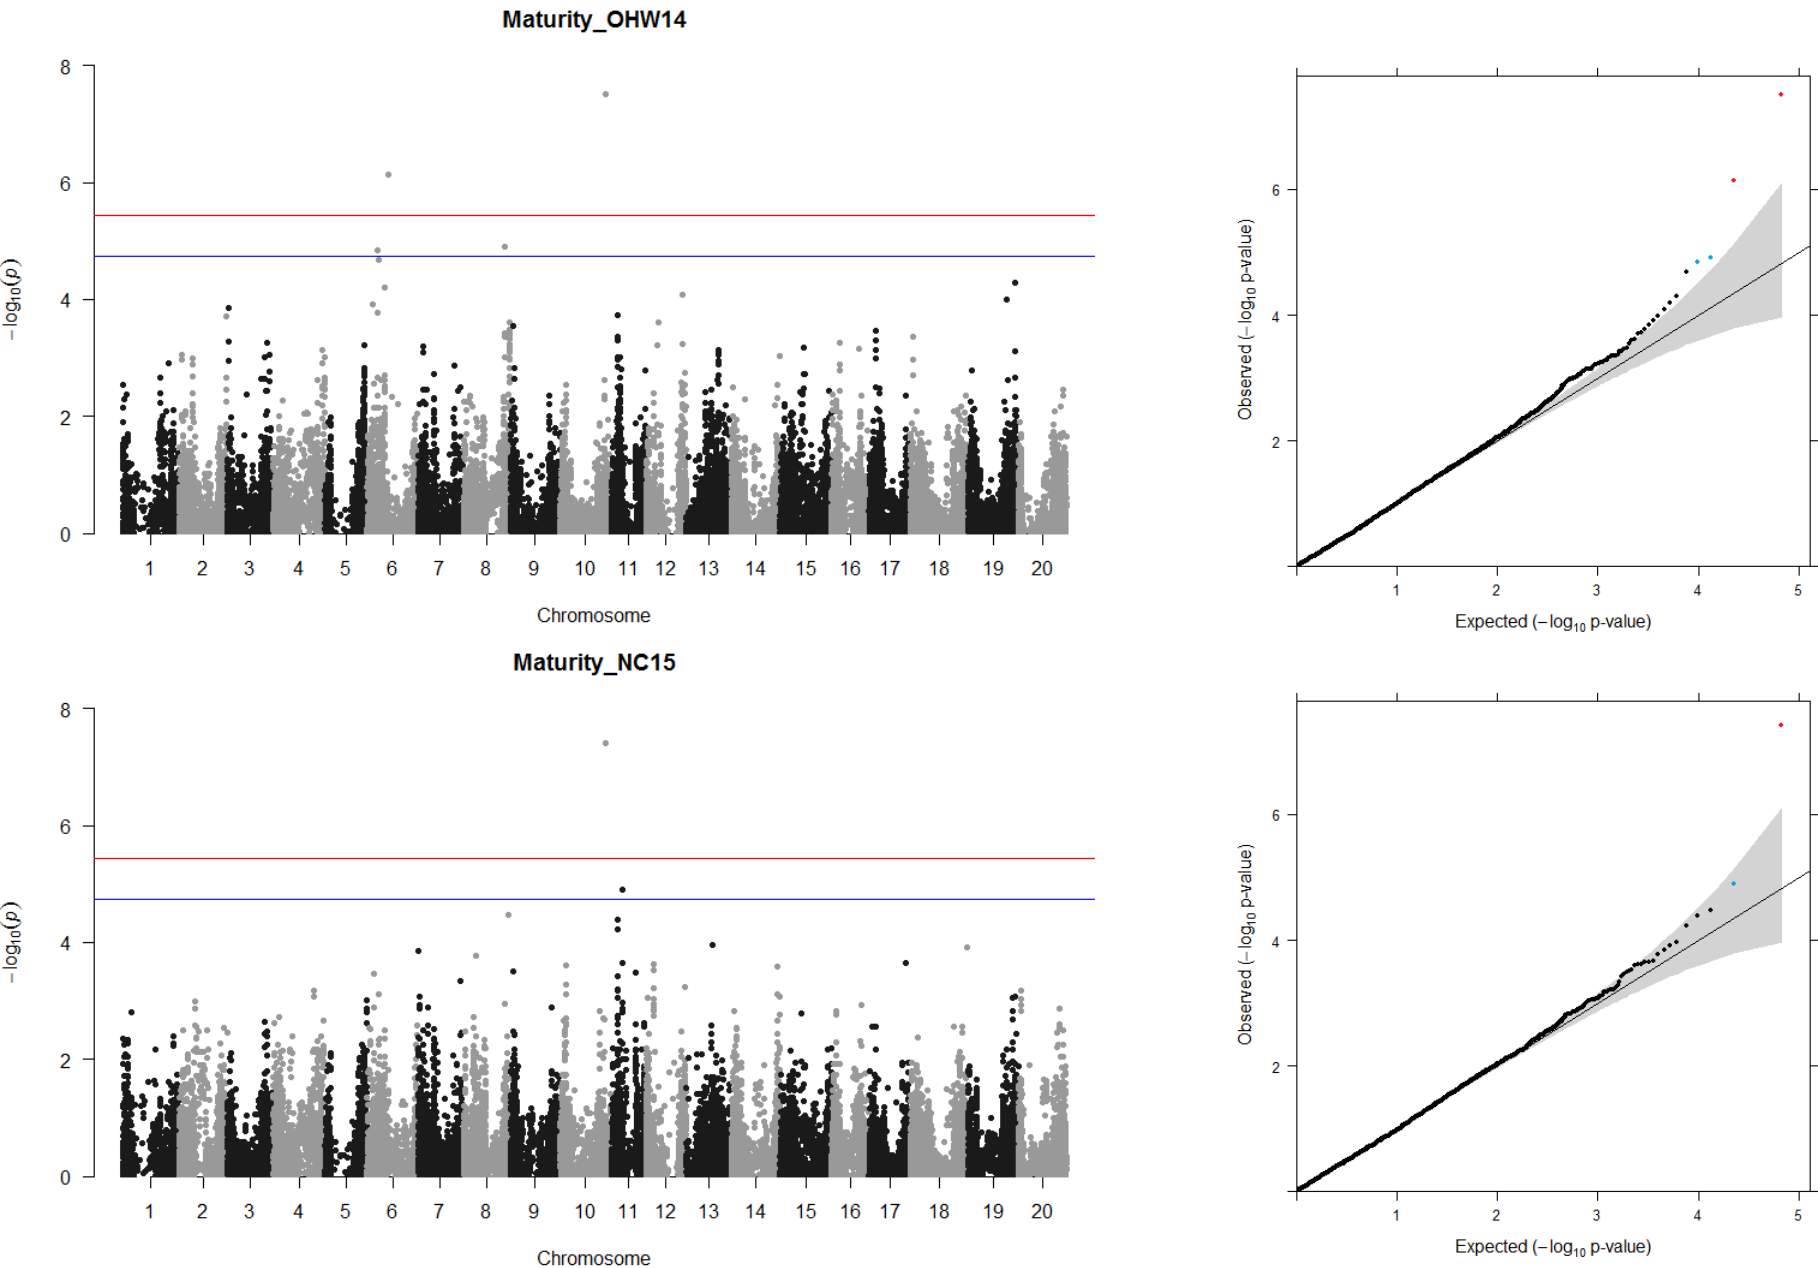

**Fig. S12** Manhattan plots (left) and QQ-plots (right) for GWAS of 621 soybean accessions for maturity using MLM. 34,014 SNPs were plotted by each environment and all environments combined. Red and blue horizontal lines in the Manhattan plots and markers in the QQ-plots represent the genome-wide significant threshold (5%) and suggestive significance thresholds (25%), respectively, and the SNPs significantly associated at those levels. Shaded region of the QQ-plots represent a 95% confidence interval.

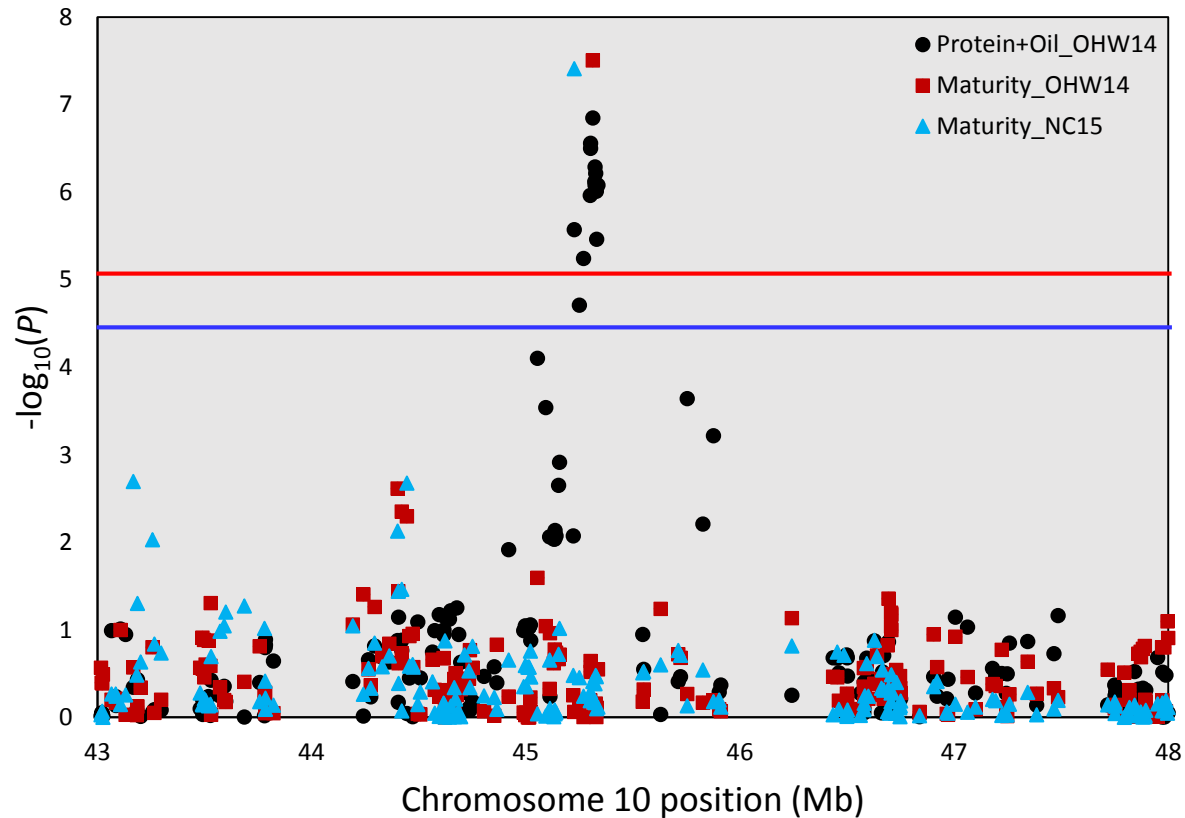

**Fig. S13** Marker associations in the 43-48 Mb region surrounding significantly associated markers on Chr 10. Negative  $\log_{10} P$ -values of MTMM for trait-specific protein and oil effects for OHW14 and MLMM for maturity in OHW14 and NC15 are plotted against physical position (Glyma.W82.a2.v1). Red and blue horizontal lines represent genome-wide (5%) and suggestive significance thresholds (25%), respectively.

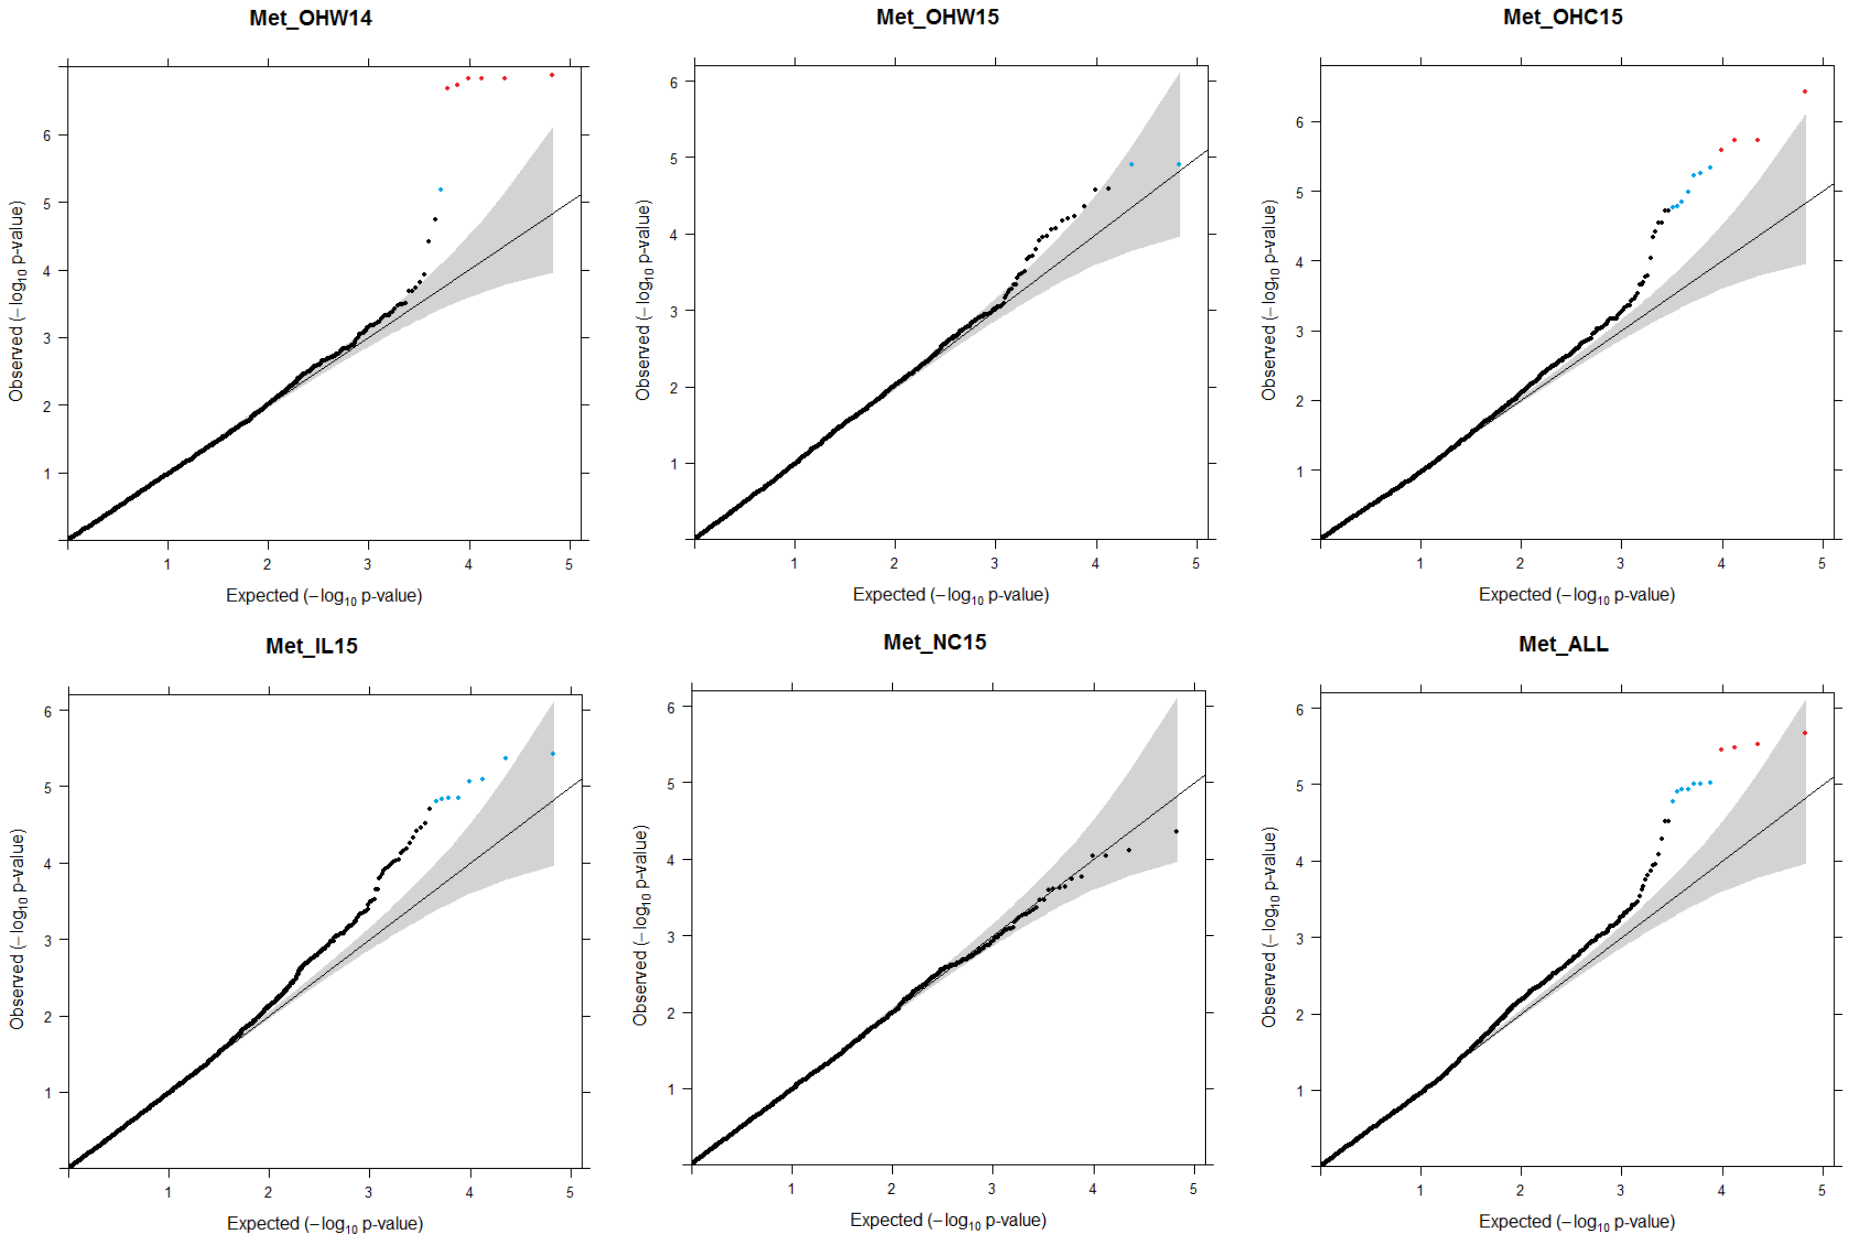

**Fig. S14** QQ-plots (right) for GWAS of 621 soybean accessions for Met using CMLM. 34,014 SNPs were plotted by each environment and all environments combined. Red and blue dots represent the SNPs significantly associated at genome-wide significant threshold (5%) and suggestive significance thresholds (25%), respectively. Shaded region of the QQ-plots represent a 95% confidence interval.

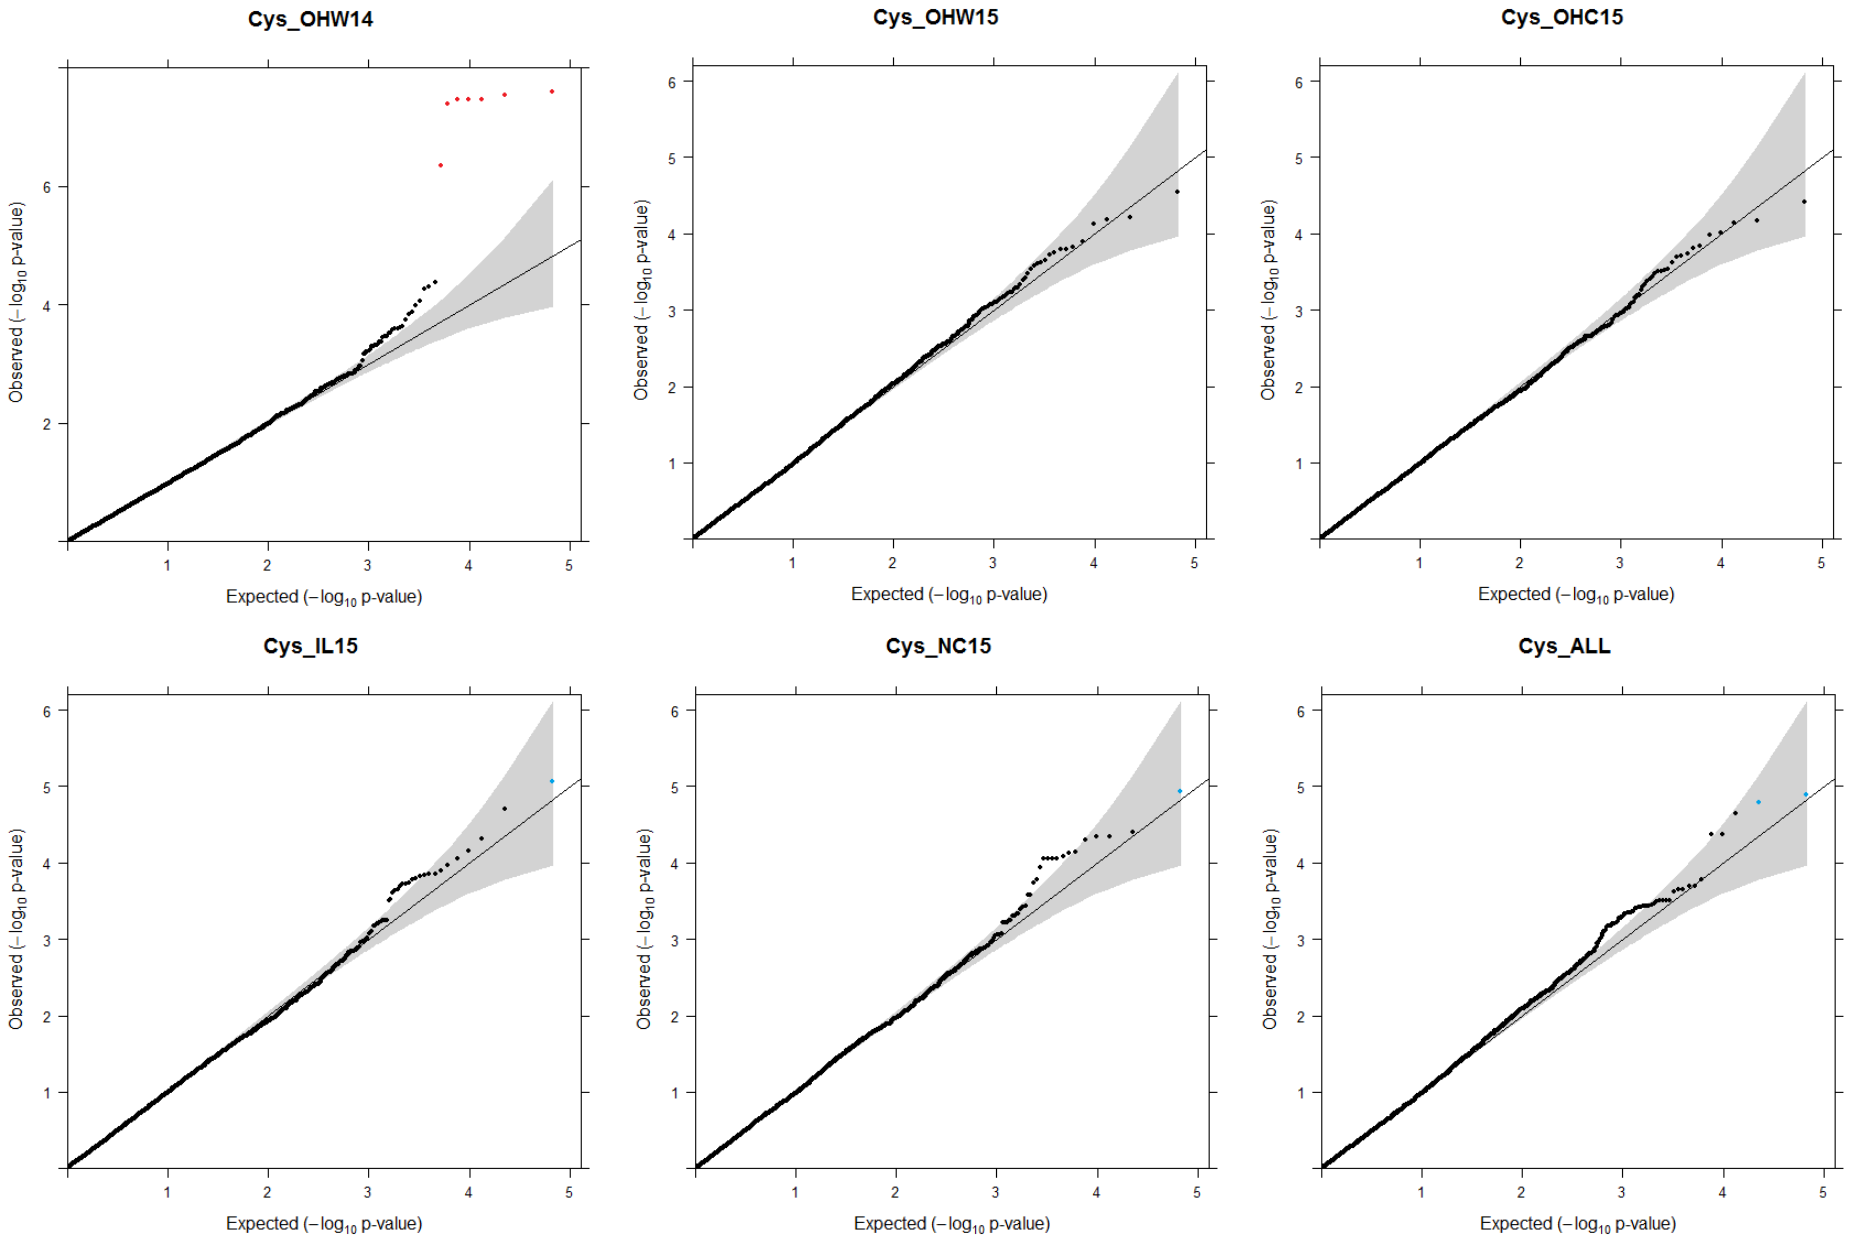

**Fig. S15** QQ-plots for GWAS of 621 soybean accessions for Cys using CMLM. 34,014 SNPs were plotted by each environment and all environments combined. Red and blue dots represent the SNPs significantly associated at genome-wide significant threshold (5%) and suggestive significance thresholds (25%), respectively. Shaded region of the QQ-plots represent a 95% confidence interval.

Lys\_OHW14

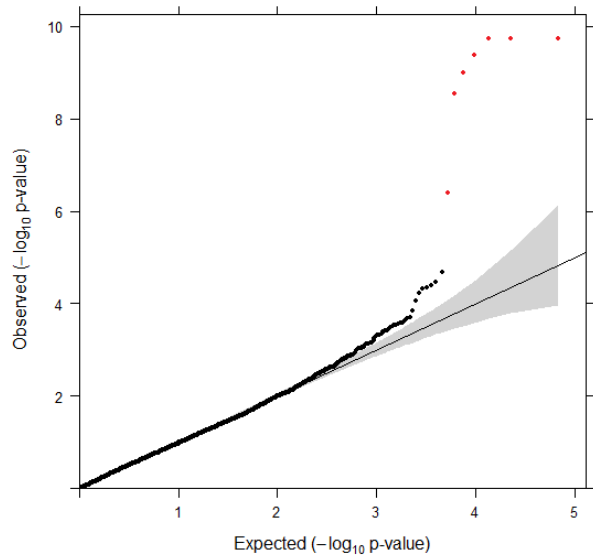

Lys\_OHW15

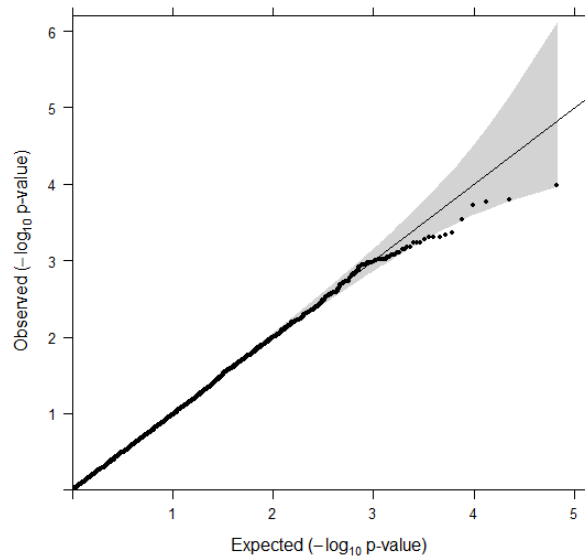

Lys\_OHC15

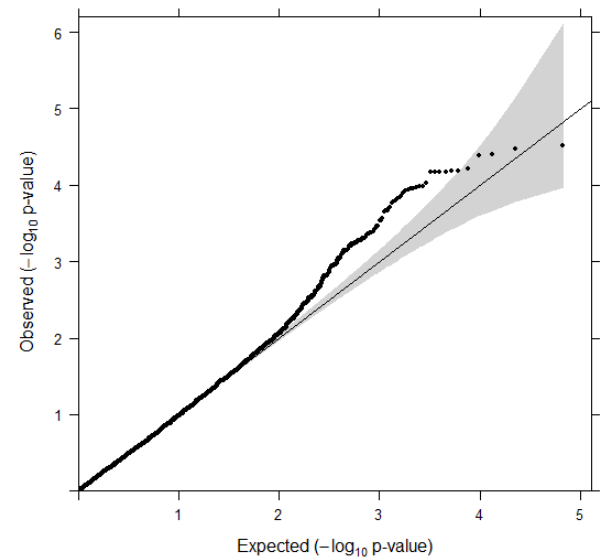

Lys\_IL15

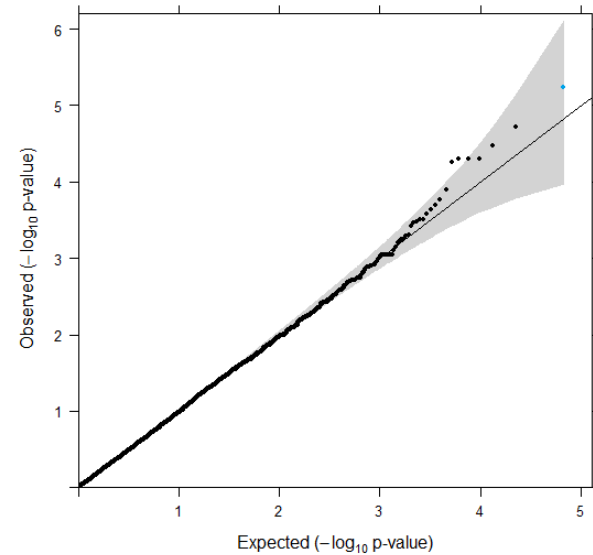

Lys\_NC15

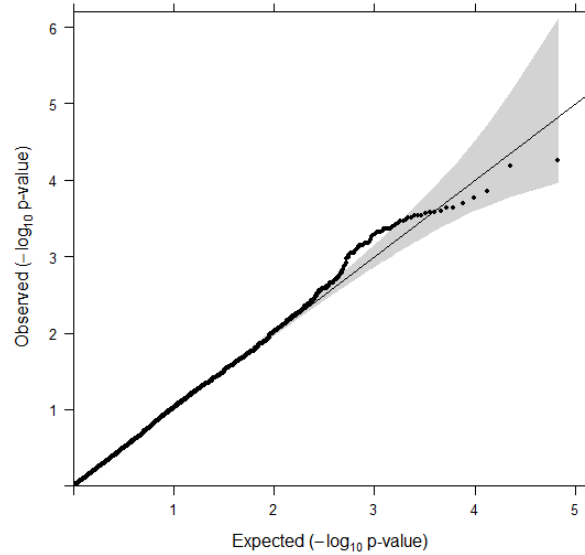

Lys\_ALL

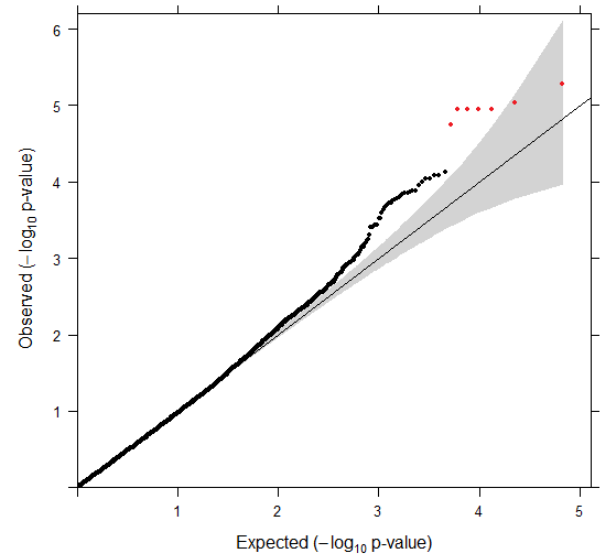

**Fig. S16** QQ-plots for GWAS of 621 soybean accessions for Lys using CMLM. 34,014 SNPs were plotted by each environment and all environments combined. Red and blue dots represent the SNPs significantly associated at genome-wide significant threshold (5%) and suggestive significance thresholds (25%), respectively. Shaded region of the QQ-plots represent a 95% confidence interval.



Thr\_OHW14

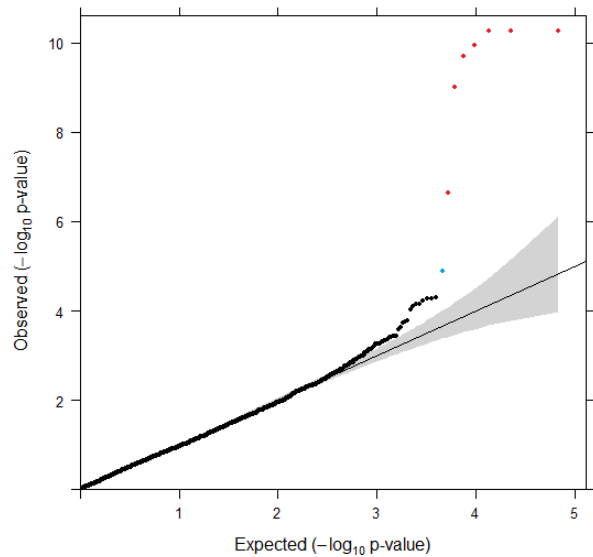

Thr\_OHW15

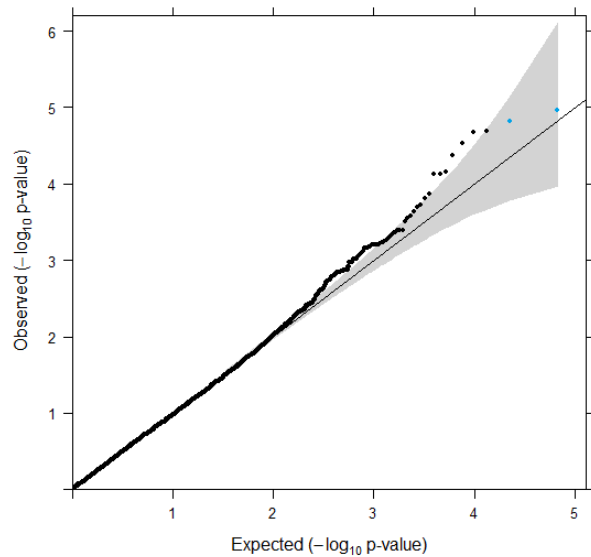

Thr\_OHC15

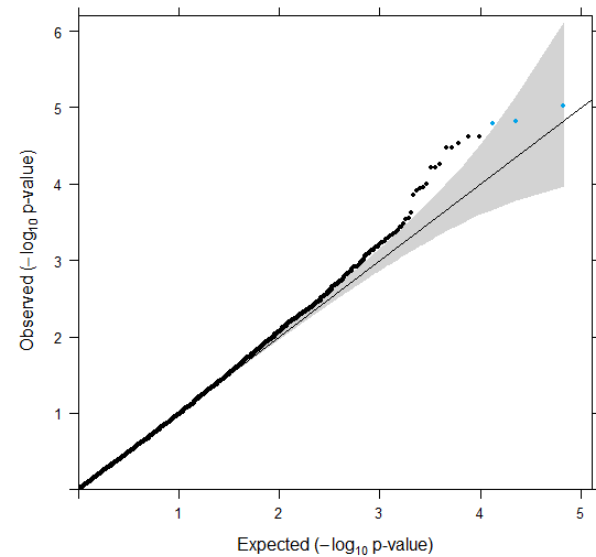

Thr\_IL15

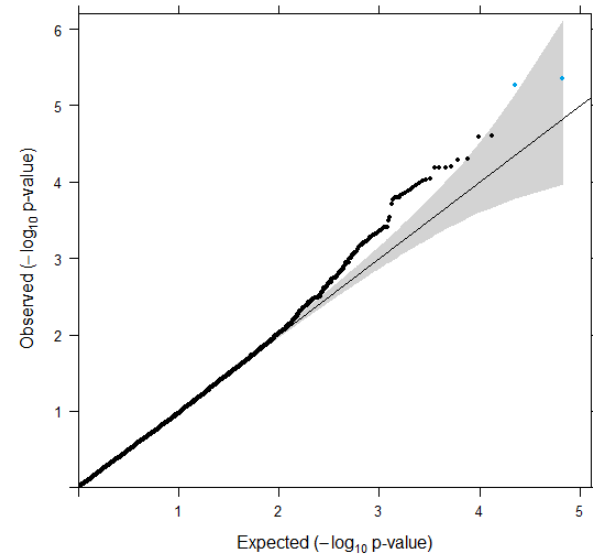

Thr\_NC15

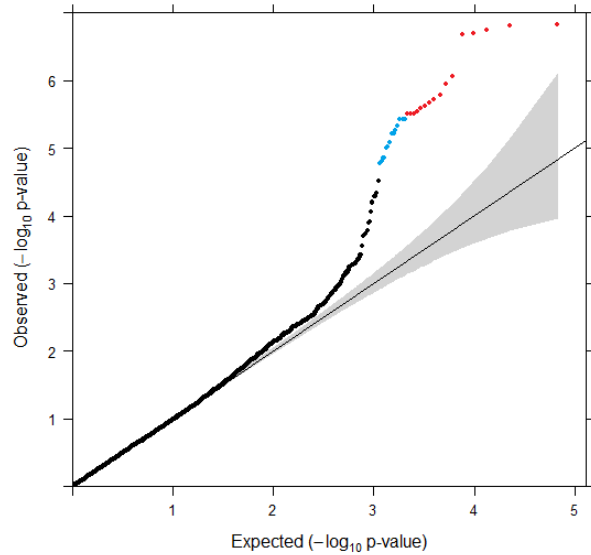

Thr\_ALL

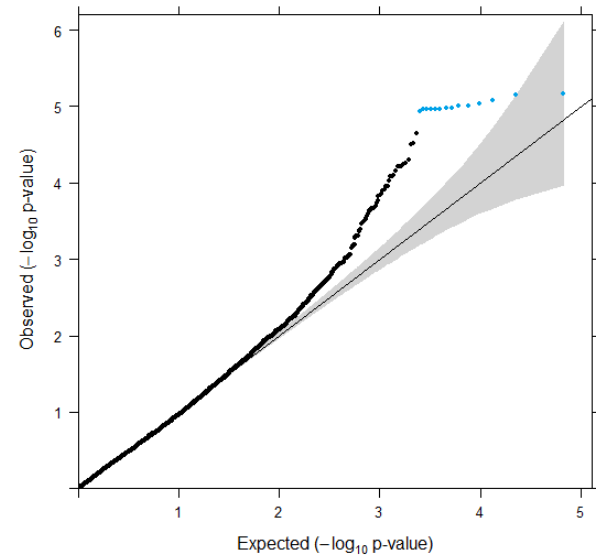

**Fig. S17** QQ-plots for GWAS of 621 soybean accessions for Thr using CMLM. 34,014 SNPs were plotted by each environment and all environments combined. Red and blue dots represent the SNPs significantly associated at genome-wide significant threshold (5%) and suggestive significance thresholds (25%), respectively. Shaded region of the QQ-plots represent a 95% confidence interval.

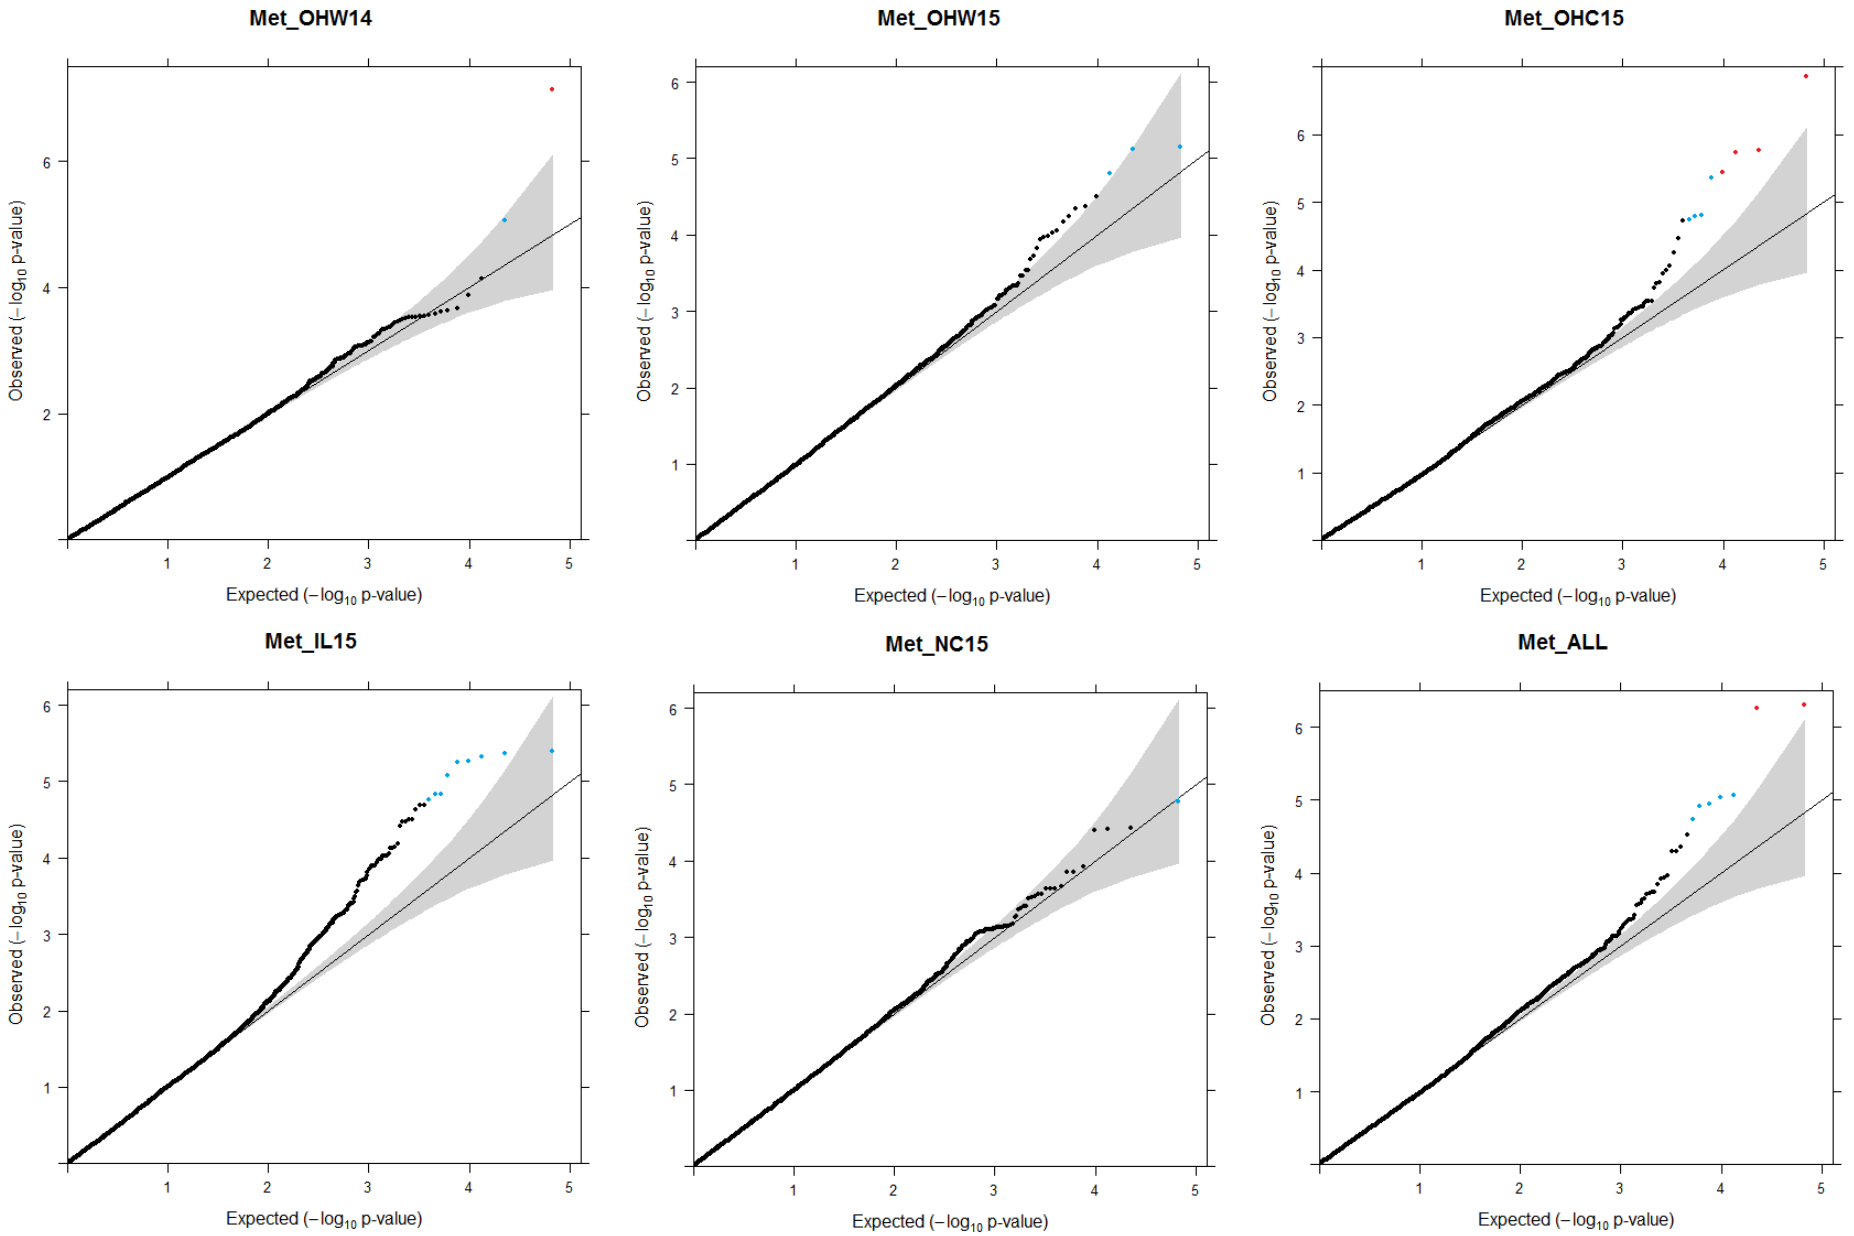

**Fig. S18** QQ-plots for GWAS of 621 soybean accessions for Met using MLMM. 34,014 SNPs were plotted by each environment and all environments combined. Red and blue dots represent the SNPs significantly associated at genome-wide significant threshold (5%) and suggestive significance thresholds (25%), respectively. Shaded region of the QQ-plots represent a 95% confidence interval.

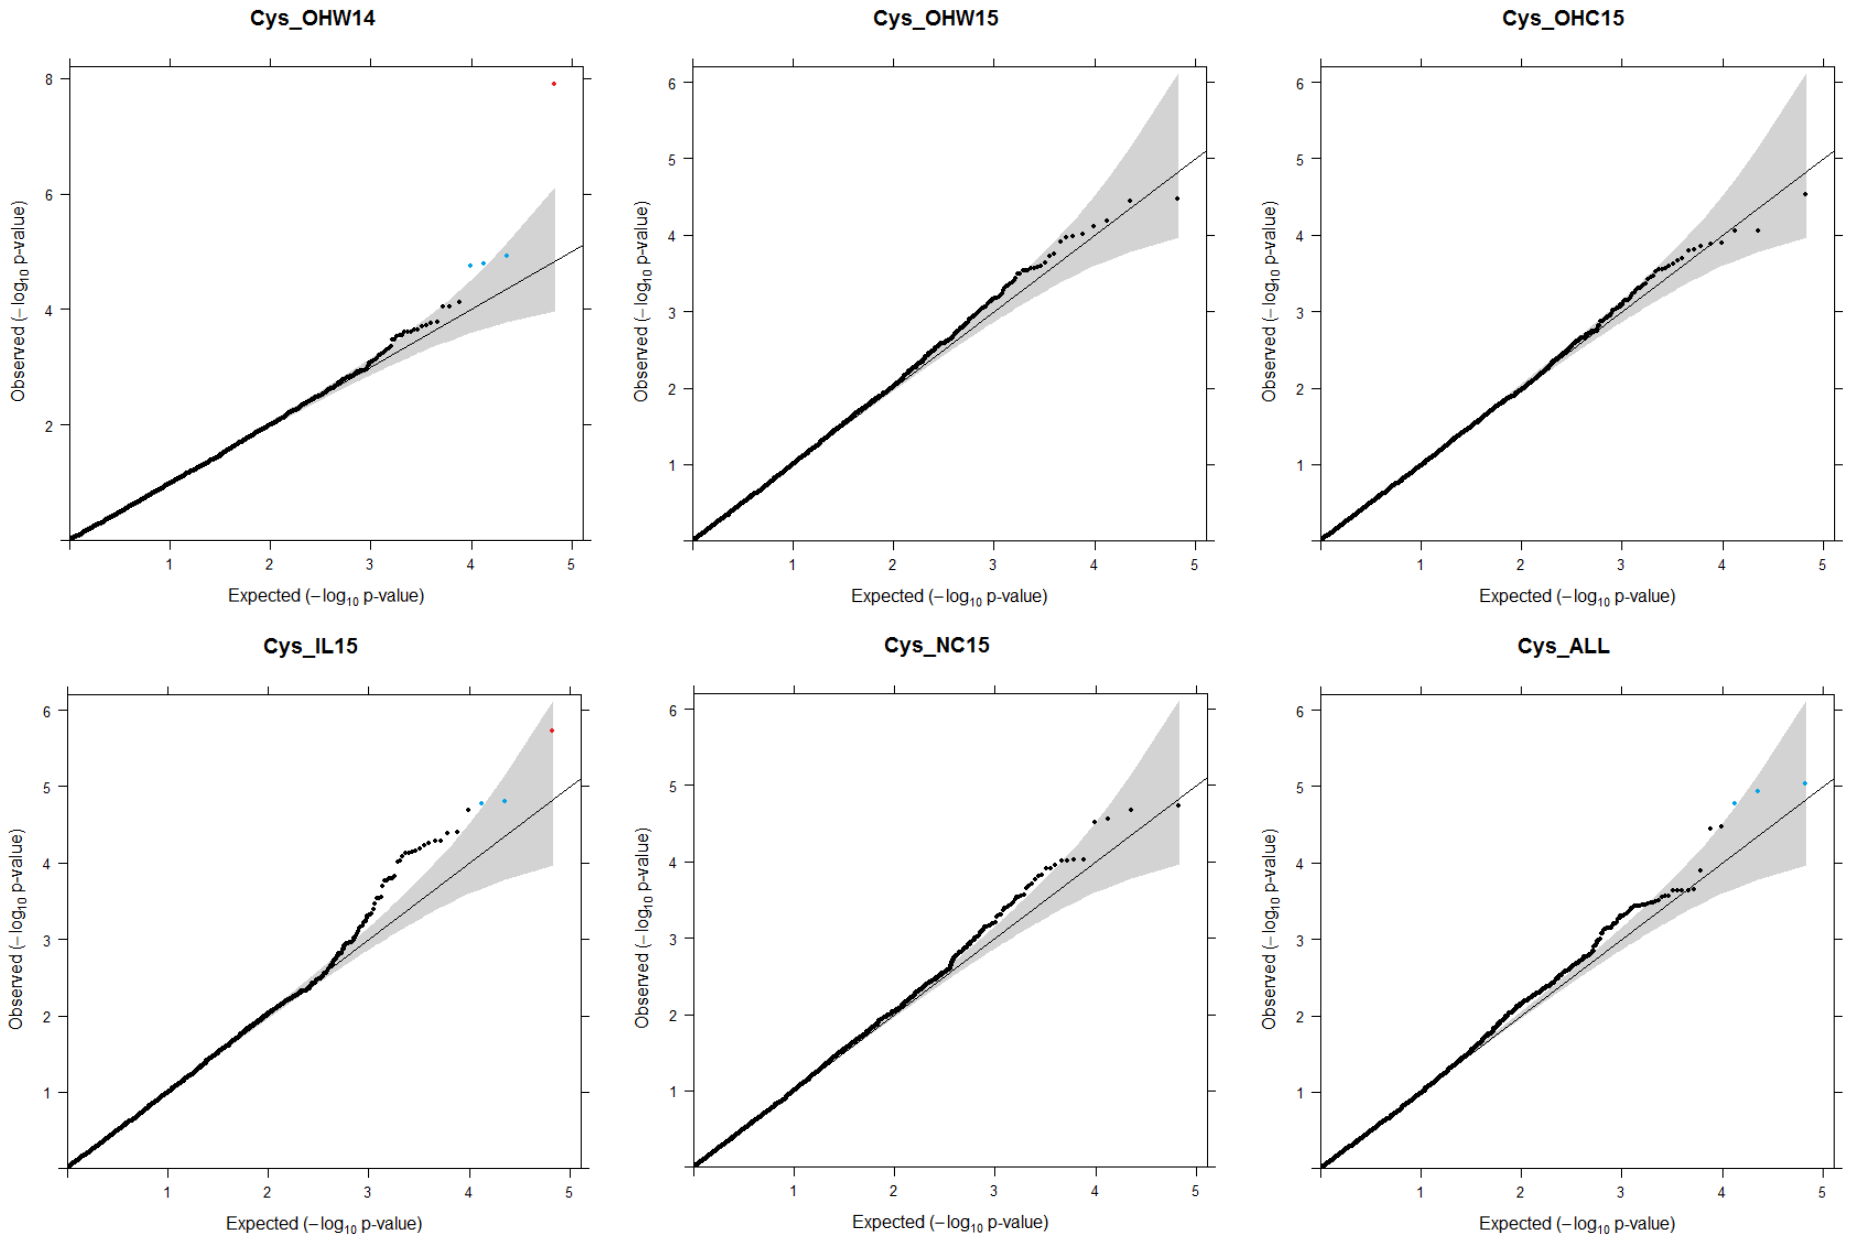

**Fig. S19** QQ-plots for GWAS of 621 soybean accessions for Cys using MLMM. 34,014 SNPs were plotted by each environment and all environments combined. Red and blue dots represent the SNPs significantly associated at genome-wide significant threshold (5%) and suggestive significance thresholds (25%), respectively. Shaded region of the QQ-plots represent a 95% confidence interval.

Lys\_OHW14

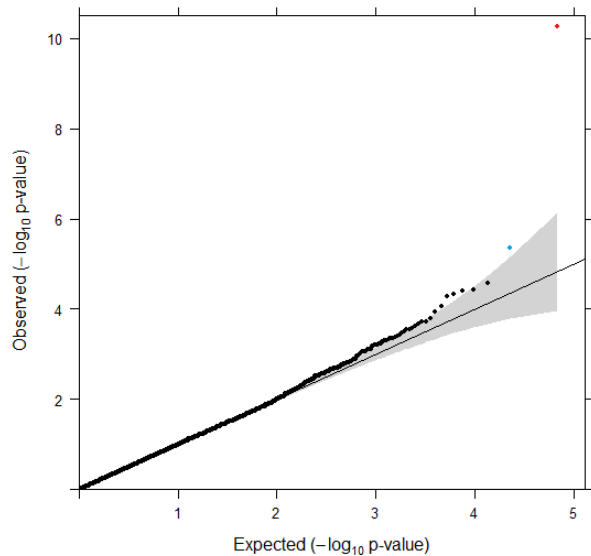

Lys\_OHW15

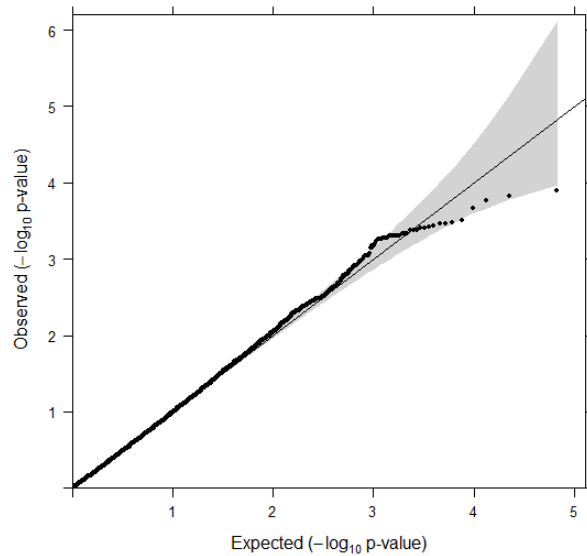

Lys\_OHC15

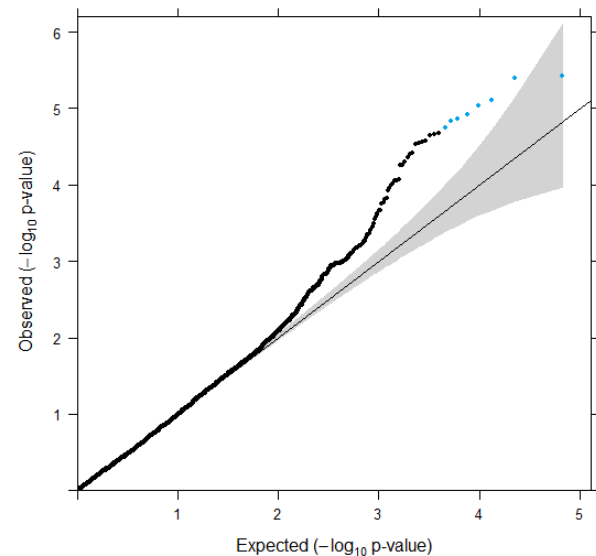

Lys\_IL15

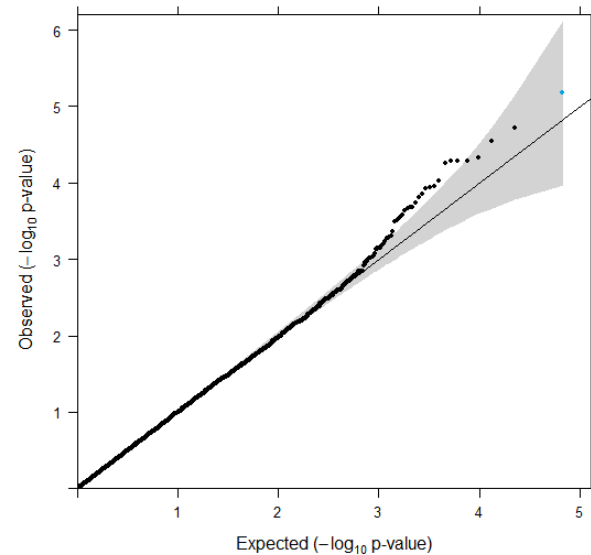

Lys\_NC15

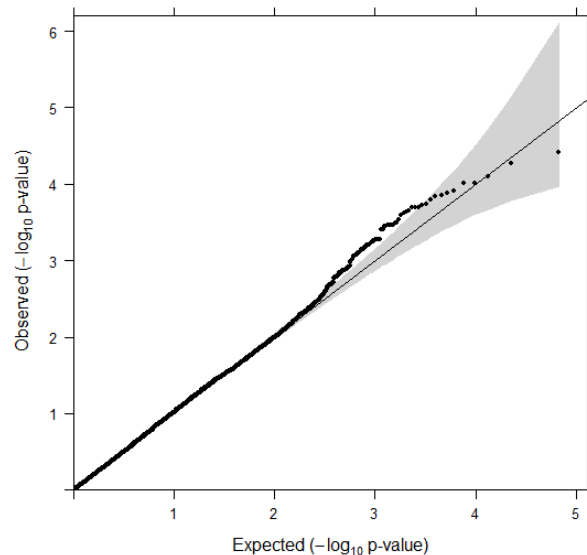

Lys\_ALL

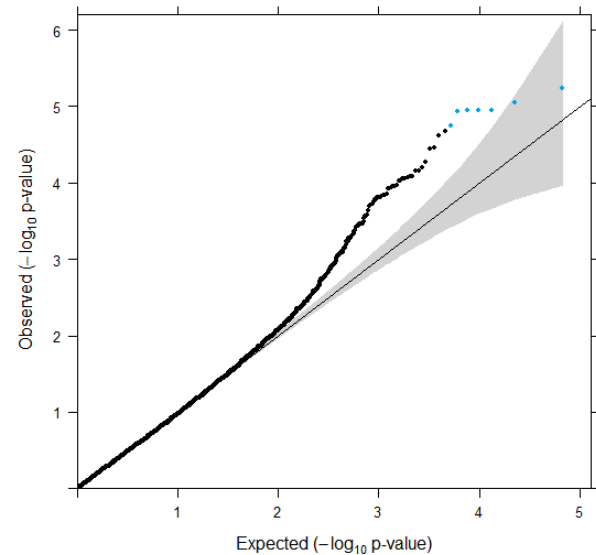

**Fig. S20** QQ-plots for GWAS of 621 soybean accessions for Lys using MLM. 34,014 SNPs were plotted by each environment and all environments combined. Red and blue dots represent the SNPs significantly associated at genome-wide significant threshold (5%) and suggestive significance thresholds (25%), respectively. Shaded region of the QQ-plots represent a 95% confidence interval.

Thr\_OHW14

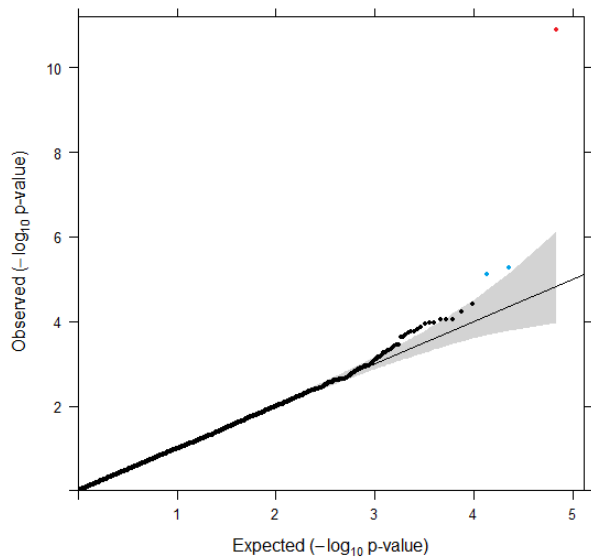

Thr\_OHW15

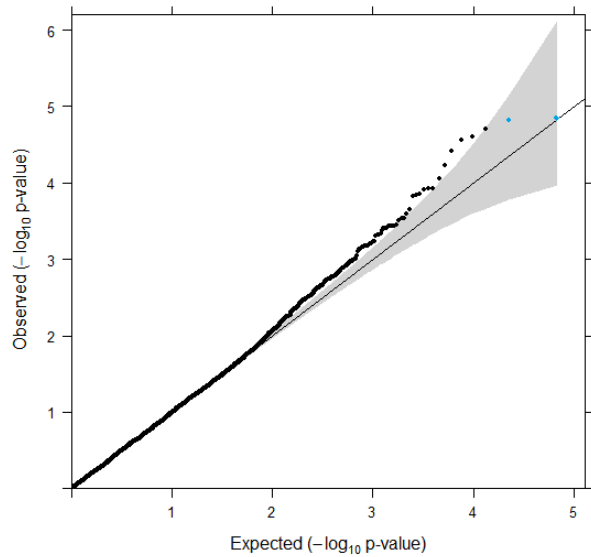

Thr\_OHC15

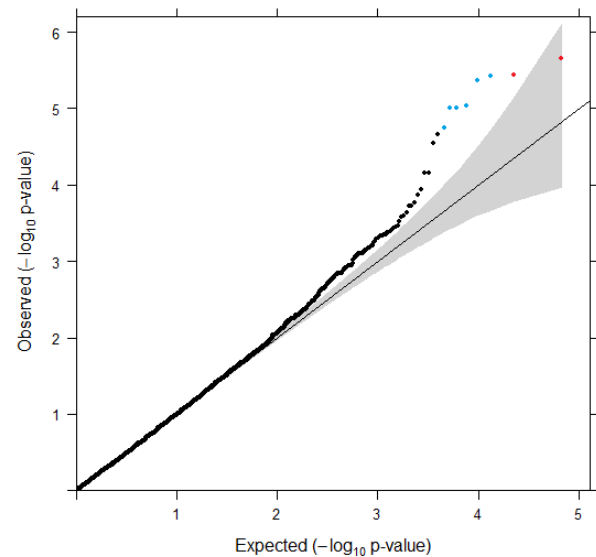

Thr\_IL15

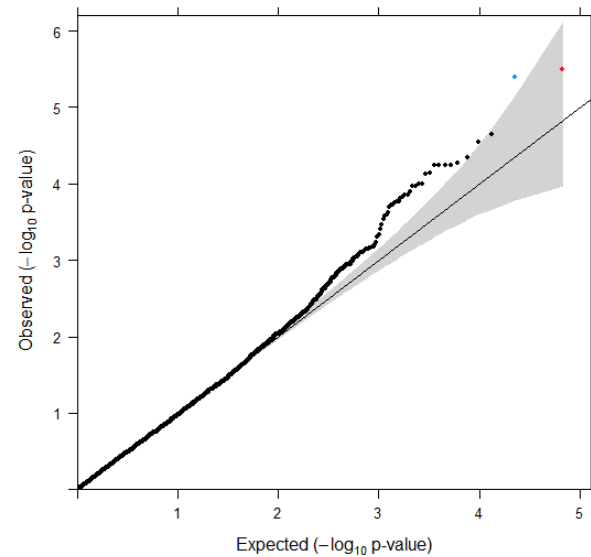

Thr\_NC15

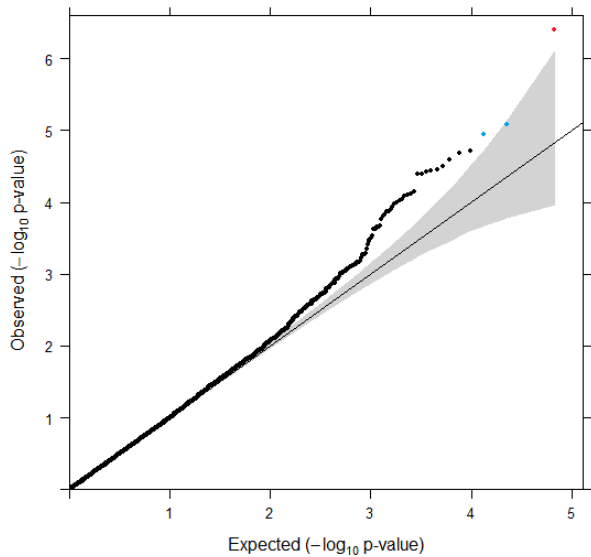

Thr\_ALL

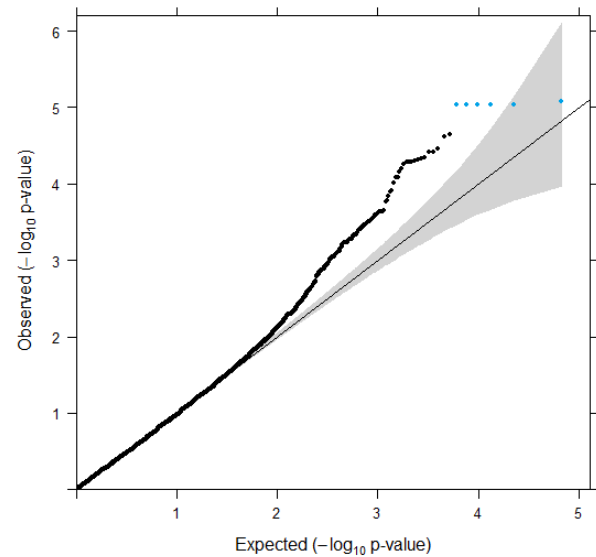

**Fig. S21** QQ-plots for GWAS of 621 soybean accessions for Thr using MLM. 34,014 SNPs were plotted by each environment and all environments combined. Red and blue dots represent the SNPs significantly associated at genome-wide significant threshold (5%) and suggestive significance thresholds (25%), respectively. Shaded region of the QQ-plots represent a 95% confidence interval.

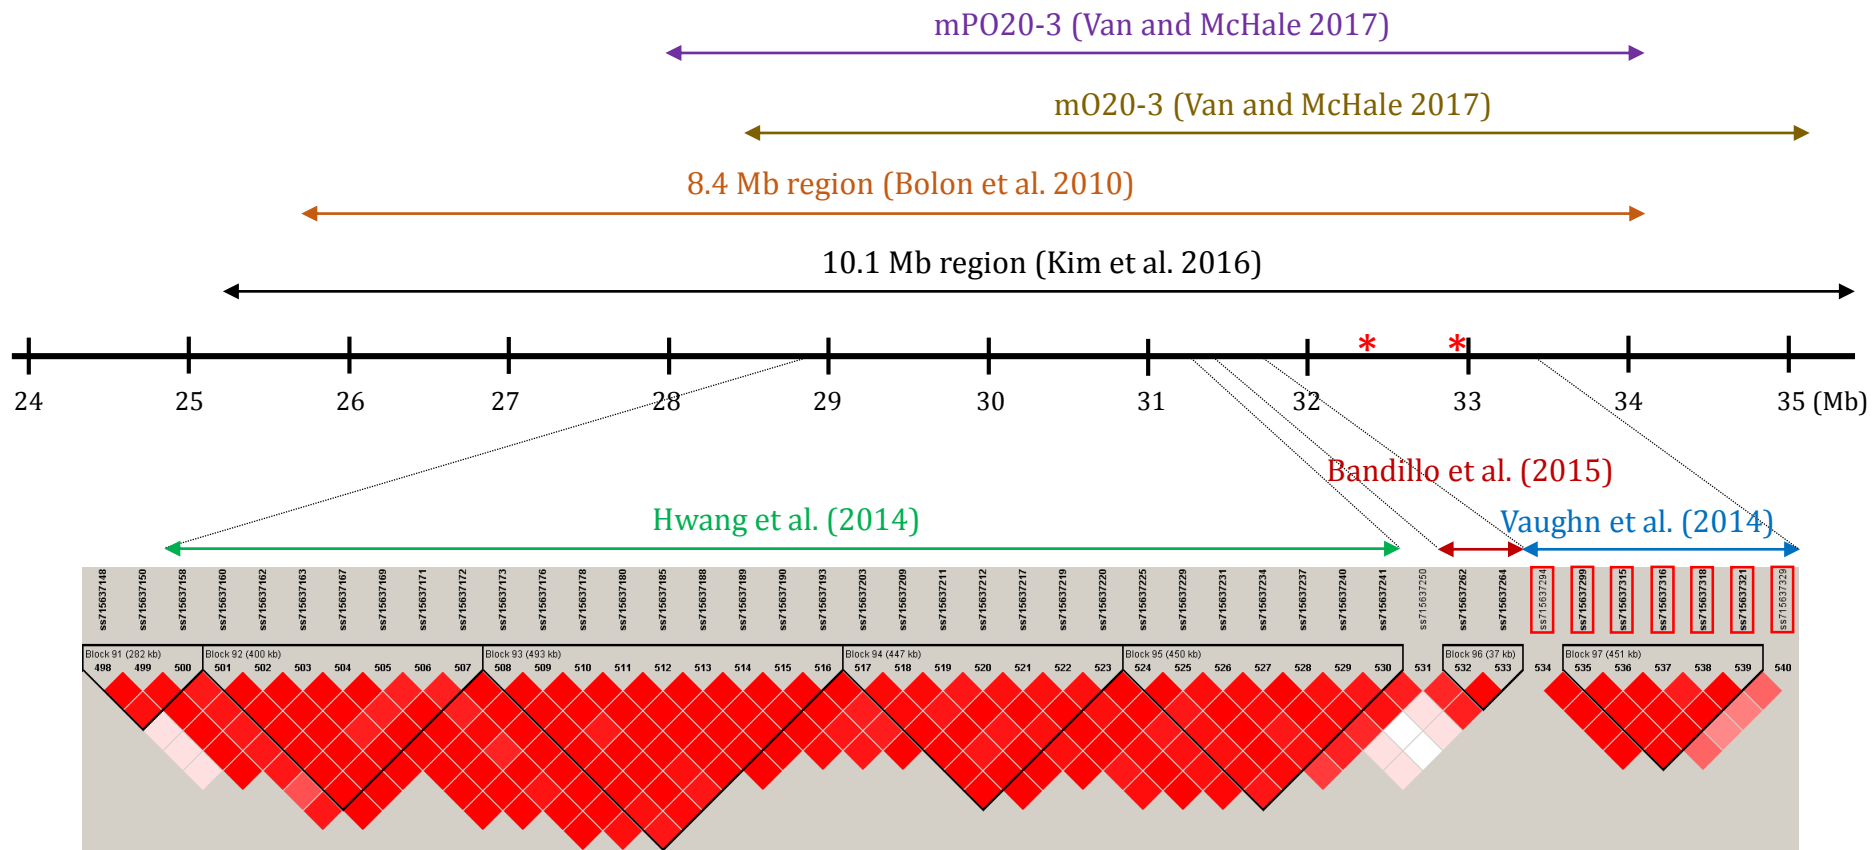

**Fig. S22** The LD blocks from Chr 20 which were significantly associated with seed protein and oil contents (current study) compared with the genomic regions from six previous studies (Bandillo et al. 2015; Bolon et al. 2010; Hwang et al. 2014; Kim et al. 2016; Van and McHale 2017; Vaughn et al. 2014). LD blocks were defined by four-gamete method. Significant SNPs of the current study were indicated by red box. Asterisks represent the putative positional candidate genes mentioned in the main text.
